# Supplementary material for: Differences in the torsional anharmonicity between reactant and transition state: the case of 3-butenal + H abstraction reactions
Source: Royal Society of Chemistry journal article supplement (doi:10.1039/d1cp03981d), 2021-01-01
Supplement: d1cp03981d1.pdf [file d1cp03981d1.pdf]

## Electronic Supplementary Information (ESI)

# Differences in the torsional anharmonicity between reactant and transition state: the case of 3-butenal + H abstraction reactions

Maiara Oliveira Passos, Igor Araujo Lins, Mateus Fernandes Venâncio, and Tiago Vinicius Alves\*

*Departamento de Físico-Química, Instituto de Química, Universidade Federal da Bahia, Rua Barão de Jeremoabo, 147, Salvador, Bahia, 40170-115, Brazil*

\*E-mail address: [tiagova@ufba.br](mailto:tiagova@ufba.br)

## Torsional Potential Energy Surface

The potential  $V_{\text{tor}}(\phi_1, \phi_2)$  are obtained from a fit to Fourier series of the type

$$\begin{aligned}
 V_{\text{tor}}(\phi_1, \phi_2) = & V_1(\phi_1) + V_2(\phi_2) + \\
 & \sum_{L_1=1}^{L_{1,max}} \sum_{L_2=1}^{L_{2,max}} c_{L_1 L_2} \cos(L_1 \phi_1) \cos(L_2 \phi_2) + \\
 & \sum_{P_1=1}^{P_{1,max}} \sum_{P_2=1}^{P_{2,max}} d_{P_1 P_2} \sin(P_1 \phi_1) \sin(P_2 \phi_2) + \sum_{L'_1=1}^{L'_{1,max}} \sum_{L'_2=1}^{L'_{2,max}} c'_{L'_1 L'_2} \cos(L'_1 \phi_1) \sin(L'_2 \phi_2) + \\
 & \sum_{P'_1=1}^{P'_{1,max}} \sum_{P'_2=1}^{P'_{2,max}} d'_{P'_1 P'_2} \sin(P'_1 \phi_1) \cos(P'_2 \phi_2)
 \end{aligned} \tag{1}$$

where  $c_{L_1 L_2}(L_1 = 1, \dots, L_{1,max}, L_2 = 1, \dots, L_{2,max})$ ,  $d_{P_1 P_2}(P_1 = 1, \dots, P_{1,max}, P_2 = 1, \dots, P_{2,max})$ ,  $c'_{L'_1 L'_2}(L'_1 = 1, \dots, L'_{1,max}, L'_2 = 1, \dots, L'_{2,max})$ , and  $d'_{P'_1 P'_2}(P'_1 = 1, \dots, P'_{1,max}, P'_2 = 1, \dots, P'_{2,max})$  are fitting parameters.  $L_{1,max}, L_{2,max}, L'_{1,max}, L'_{2,max}, P_{1,max}, P_{2,max}, P'_{1,max}$ , and  $P'_{2,max}$ , indicate the largest number of each series.

The one-dimensional potentials are:

$$V_1(\phi_1) = a_0 + \sum_{M=1}^{M_{max}} a_M \cos(M \phi_1) + \sum_{M=1}^{M_{max}} a'_M \sin(M \phi_1) \tag{2}$$

and

$$V_2(\phi_2) = b_0 + \sum_{N=1}^{N_{max}} b_N \cos(N \phi_2) + \sum_{N=1}^{N_{max}} b'_N \sin(N \phi_2) \tag{3}$$

where,  $a_0, b_0, a_M(M = 1, \dots, M_{max}), a'_M(M = 1, \dots, M_{max}), b_N(N = 1, \dots, N_{max})$  and  $b'_N(N = 1, \dots, N_{max})$  are fitting parameters.  $M_{max}$  and  $N_{max}$ , are the largest number of each series.

Table S1: Parameters (in  $\text{cm}^{-1}$ ) used to fit by Fourier series the two-dimensional torsional potential for 3-butenal (including coupling parameters).

| Parameters         |                       |
|--------------------|-----------------------|
| $a_0$              | +694.6103             |
| $a_1$              | -141.8636             |
| $a_2$              | -147.5198             |
| $a_3$              | +215.6993             |
| $a_4$              | -15.5629              |
| $a_5$              | +5.4467               |
| $a_6$              | +1.8822               |
| $a_7$              | +1.1580               |
| $a_8$              | +0.0799               |
| $a_9$              | -0.0744               |
| $a_{10}$           | +0.1226               |
| $b_1$              | +143.2052             |
| $b_2$              | +130.3129             |
| $b_3$              | -236.9447             |
| $b_4$              | +25.0537              |
| $b_5$              | -5.4749               |
| $b_6$              | +10.4460              |
| $b_7$              | -2.2289               |
| $b_8$              | +0.5164               |
| $b_9$              | -0.4289               |
| $b_{10}$           | -0.1409               |
| $c_{11}, d_{11}$   | -130.6986 , +7.3143   |
| $c_{21}, d_{21}$   | +119.7630 , +1.6295   |
| $c_{31}, d_{31}$   | -5.5331 , -15.3181    |
| $c_{41}, d_{41}$   | -6.7536 , +4.6546     |
| $c_{51}, d_{51}$   | +1.7502 , +0.4648     |
| $c_{61}, d_{61}$   | -0.2652 , +0.9868     |
| $c_{71}, d_{71}$   | +0.2579 , +0.0317     |
| $c_{81}, d_{81}$   | +0.1167 , -0.1181     |
| $c_{91}, d_{91}$   | -0.1393 , -0.0700     |
| $c_{101}, d_{101}$ | +0.1656 , +0.1273     |
| $c_{12}, d_{12}$   | +139.2229 , -239.8053 |
| $c_{22}, d_{22}$   | -64.6275 , +92.5732   |
| $c_{32}, d_{32}$   | -16.6150 , +20.8889   |

Continued on next page

Table S1 – continued from previous page

| Parameters         |                     |
|--------------------|---------------------|
| $c_{42}, d_{42}$   | +18.9465 , -16.9536 |
| $c_{52}, d_{52}$   | +1.2943 , +0.7800   |
| $c_{62}, d_{62}$   | -0.6790 , +1.6510   |
| $c_{72}, d_{72}$   | -0.1670 , +0.3775   |
| $c_{82}, d_{82}$   | -0.0905 , +0.0130   |
| $c_{92}, d_{92}$   | -0.0219 , -0.0434   |
| $c_{102}, d_{102}$ | +0.0046 , +0.1205   |
| $c_{13}, d_{13}$   | +53.8969 , -84.7810 |
| $c_{23}, d_{23}$   | +69.9925 , -76.5627 |
| $c_{33}, d_{33}$   | -6.2132 , +0.7293   |
| $c_{43}, d_{43}$   | +0.8661 , -2.0325   |
| $c_{53}, d_{53}$   | +6.2695 , -8.0044   |
| $c_{63}, d_{63}$   | -2.4561 , +2.3742   |
| $c_{73}, d_{73}$   | -0.1604 , +0.5842   |
| $c_{83}, d_{83}$   | +0.0737 , -0.1860   |
| $c_{93}, d_{93}$   | +0.0770 , -0.0758   |
| $c_{103}, d_{103}$ | -0.0534 , +0.0353   |
| $c_{14}, d_{14}$   | +19.8210 , -29.1254 |
| $c_{24}, d_{24}$   | +24.8769 , -33.9313 |
| $c_{34}, d_{34}$   | +5.0801 , -0.7241   |
| $c_{44}, d_{44}$   | +9.3616 , -7.6849   |
| $c_{54}, d_{54}$   | +1.0784 , -1.6631   |
| $c_{64}, d_{64}$   | -1.1246 , +0.6648   |
| $c_{74}, d_{74}$   | +0.2991 , -0.1419   |
| $c_{84}, d_{84}$   | -0.0648 , -0.1403   |
| $c_{94}, d_{94}$   | +0.0881 , -0.0170   |
| $c_{104}, d_{104}$ | -0.0940 , +0.0048   |
| $c_{15}, d_{15}$   | -0.2262 , +6.9837   |
| $c_{25}, d_{25}$   | +17.8936 , -23.9126 |
| $c_{35}, d_{35}$   | +3.5013 , -5.0361   |
| $c_{45}, d_{45}$   | +5.8253 , -4.7867   |
| $c_{55}, d_{55}$   | -0.5286 , +0.6486   |
| $c_{65}, d_{65}$   | -0.5474 , +0.1106   |
| $c_{75}, d_{75}$   | +0.2308 , -0.3436   |
| $c_{85}, d_{85}$   | +0.1286 , -0.0706   |
| $c_{95}, d_{95}$   | -0.0438 , -0.1128   |

Continued on next page

Table S1 – continued from previous page

| Parameters         |                   |
|--------------------|-------------------|
| $c_{105}, d_{105}$ | +0.0026 , +0.0491 |
| $c_{16}, d_{16}$   | -0.5205 , +3.0572 |
| $c_{26}, d_{26}$   | -0.2176 , +1.8142 |
| $c_{36}, d_{36}$   | +2.6233 , -2.8892 |
| $c_{46}, d_{46}$   | +2.1820 , -2.1509 |
| $c_{56}, d_{56}$   | +0.1531 , +0.2181 |
| $c_{66}, d_{66}$   | -0.6988 , +0.4585 |
| $c_{76}, d_{76}$   | +0.3140 , -0.4552 |
| $c_{86}, d_{86}$   | +0.1411 , -0.0219 |
| $c_{96}, d_{96}$   | -0.1183 , +0.0837 |
| $c_{106}, d_{106}$ | +0.0701 , -0.0637 |
| $c_{17}, d_{17}$   | -1.1565 , +1.5560 |
| $c_{27}, d_{27}$   | -1.0600 , +2.2239 |
| $c_{37}, d_{37}$   | +0.2484 , -0.5455 |
| $c_{47}, d_{47}$   | -1.1343 , +0.4800 |
| $c_{57}, d_{57}$   | +0.5101 , -0.5025 |
| $c_{67}, d_{67}$   | -0.3057 , +0.4877 |
| $c_{77}, d_{77}$   | -0.1277 , -0.2668 |
| $c_{87}, d_{87}$   | +0.2452 , -0.0279 |
| $c_{97}, d_{97}$   | +0.0228 , +0.1710 |
| $c_{107}, d_{107}$ | -0.0315 , -0.1710 |
| $c_{18}, d_{18}$   | -0.4633 , -0.7449 |
| $c_{28}, d_{28}$   | -1.7875 , +2.4587 |
| $c_{38}, d_{38}$   | -0.3650 , +0.8257 |
| $c_{48}, d_{48}$   | -1.2907 , +0.9226 |
| $c_{58}, d_{58}$   | +0.4285 , -0.6002 |
| $c_{68}, d_{68}$   | -0.2184 , +0.3529 |
| $c_{78}, d_{78}$   | -0.2392 , +0.0087 |
| $c_{88}, d_{88}$   | +0.1955 , -0.1052 |
| $c_{98}, d_{98}$   | +0.0532 , +0.2466 |
| $c_{108}, d_{108}$ | -0.1118 , -0.1581 |
| $c_{19}, d_{19}$   | -0.1742 , -0.3086 |
| $c_{29}, d_{29}$   | -0.6271 , -0.1534 |
| $c_{39}, d_{39}$   | -0.3123 , +0.6025 |
| $c_{49}, d_{49}$   | -0.8753 , +1.1892 |
| $c_{59}, d_{59}$   | +0.1227 , -0.5343 |

Continued on next page

Table S1 – continued from previous page

---

| Parameters           |                   |
|----------------------|-------------------|
| $c_{69}, d_{69}$     | +0.0512 , +0.2118 |
| $c_{79}, d_{79}$     | -0.2507 , +0.1073 |
| $c_{89}, d_{89}$     | +0.0381 , -0.0308 |
| $c_{99}, d_{99}$     | +0.1269 , -0.0874 |
| $c_{109}, d_{109}$   | -0.0564 , +0.2127 |
| $c_{110}, d_{110}$   | +0.2272 , +0.0364 |
| $c_{210}, d_{210}$   | -0.4348 , -0.4999 |
| $c_{310}, d_{310}$   | +0.1891 , +0.3651 |
| $c_{410}, d_{410}$   | -0.4932 , +0.3763 |
| $c_{510}, d_{510}$   | +0.2019 , -0.1480 |
| $c_{610}, d_{610}$   | -0.1102 , +0.0715 |
| $c_{710}, d_{710}$   | -0.1283 , +0.1533 |
| $c_{810}, d_{810}$   | +0.1155 , -0.0104 |
| $c_{910}, d_{910}$   | -0.1306 , -0.1294 |
| $c_{1010}, d_{1010}$ | +0.0256 , +0.1520 |

---

Table S2: Parameters (in  $\text{cm}^{-1}$ ) used to fit by Fourier series the two-dimensional torsional potential for CRC1 (including coupling parameters).

| Parameters         |                      |
|--------------------|----------------------|
| $a_0$              | +717.4953            |
| $a_1$              | +2.4101              |
| $a_2$              | -103.8992            |
| $a_3$              | +191.8351            |
| $a_4$              | -12.7525             |
| $a_5$              | +0.7351              |
| $a_6$              | +0.8981              |
| $a_7$              | +0.6797              |
| $a_8$              | +0.0073              |
| $a_9$              | -0.0971              |
| $a_{10}$           | -0.0276              |
| $b_1$              | +134.8187            |
| $b_2$              | +153.8959            |
| $b_3$              | -238.7042            |
| $b_4$              | +24.7767             |
| $b_5$              | -7.5153              |
| $b_6$              | +10.5966             |
| $b_7$              | -2.1790              |
| $b_8$              | +0.7372              |
| $b_9$              | -0.3915              |
| $b_{10}$           | +0.1203              |
| $c_{11}, d_{11}$   | -27.6147 , -16.8639  |
| $c_{21}, d_{21}$   | +148.9874 , -32.6210 |
| $c_{31}, d_{31}$   | +22.1186 , -32.7313  |
| $c_{41}, d_{41}$   | -6.6001 , -2.2626    |
| $c_{51}, d_{51}$   | -2.7652 , +3.4027    |
| $c_{61}, d_{61}$   | -1.8957 , +3.3823    |
| $c_{71}, d_{71}$   | +0.6746 , +0.8855    |
| $c_{81}, d_{81}$   | +0.6689 , -1.1073    |
| $c_{91}, d_{91}$   | -0.1442 , -0.3261    |
| $c_{101}, d_{101}$ | -0.2312 , +0.1898    |
| $c_{12}, d_{12}$   | +93.7319 , -184.1258 |
| $c_{22}, d_{22}$   | -64.4824 , +102.1510 |
| $c_{32}, d_{32}$   | +3.5303 , -3.4981    |

Continued on next page

Table S2 – continued from previous page

| Parameters         |                     |
|--------------------|---------------------|
| $c_{42}, d_{42}$   | +25.8748 , -28.3723 |
| $c_{52}, d_{52}$   | +4.0631 , -0.9857   |
| $c_{62}, d_{62}$   | -2.0206 , +3.7798   |
| $c_{72}, d_{72}$   | -1.1903 , +1.1418   |
| $c_{82}, d_{82}$   | -0.5046 , -0.0415   |
| $c_{92}, d_{92}$   | +0.3377 , -0.1915   |
| $c_{102}, d_{102}$ | +0.0937 , +0.2207   |
| $c_{13}, d_{13}$   | +45.2690 , -79.9750 |
| $c_{23}, d_{23}$   | +51.3502 , -62.1129 |
| $c_{33}, d_{33}$   | -1.1373 , -6.0456   |
| $c_{43}, d_{43}$   | +8.8662 , -9.6632   |
| $c_{53}, d_{53}$   | +6.7909 , -6.2278   |
| $c_{63}, d_{63}$   | -3.7776 , +3.7194   |
| $c_{73}, d_{73}$   | -2.2163 , +1.5045   |
| $c_{83}, d_{83}$   | +0.2542 , -0.3790   |
| $c_{93}, d_{93}$   | +0.5194 , -0.4274   |
| $c_{103}, d_{103}$ | +0.1458 , -0.2768   |
| $c_{14}, d_{14}$   | +19.9658 , -31.7138 |
| $c_{24}, d_{24}$   | +19.2432 , -29.3673 |
| $c_{34}, d_{34}$   | +10.3343 , -5.9933  |
| $c_{44}, d_{44}$   | +16.3851 , -14.0622 |
| $c_{54}, d_{54}$   | +5.3093 , -5.9776   |
| $c_{64}, d_{64}$   | -1.3257 , +0.4786   |
| $c_{74}, d_{74}$   | -0.8917 , +0.7787   |
| $c_{84}, d_{84}$   | -0.3491 , +0.6365   |
| $c_{94}, d_{94}$   | +0.0346 , -0.0517   |
| $c_{104}, d_{104}$ | +0.0760 , -0.2901   |
| $c_{15}, d_{15}$   | -0.2802 , +3.3870   |
| $c_{25}, d_{25}$   | +16.5609 , -22.9662 |
| $c_{35}, d_{35}$   | +5.7691 , -5.3038   |
| $c_{45}, d_{45}$   | +6.9822 , -6.2661   |
| $c_{55}, d_{55}$   | +2.3099 , -3.0224   |
| $c_{65}, d_{65}$   | -0.0565 , -0.4039   |
| $c_{75}, d_{75}$   | -0.3929 , +0.6325   |
| $c_{85}, d_{85}$   | -0.4595 , +0.4075   |
| $c_{95}, d_{95}$   | -0.1785 , -0.3041   |

Continued on next page



Table S2 – continued from previous page

| Parameters         |                   |
|--------------------|-------------------|
| $c_{105}, d_{105}$ | +0.1950 , -0.2559 |
| $c_{16}, d_{16}$   | -0.5301 , +3.8837 |
| $c_{26}, d_{26}$   | +0.0145 , +1.8950 |
| $c_{36}, d_{36}$   | +2.1417 , -2.1623 |
| $c_{46}, d_{46}$   | +0.9277 , -0.8527 |
| $c_{56}, d_{56}$   | -0.4120 , +0.4024 |
| $c_{66}, d_{66}$   | -1.3125 , +1.5731 |
| $c_{76}, d_{76}$   | -0.5324 , +0.4419 |
| $c_{86}, d_{86}$   | -0.3817 , +0.3130 |
| $c_{96}, d_{96}$   | -0.2805 , +0.0884 |
| $c_{106}, d_{106}$ | +0.0746 , -0.0828 |
| $c_{17}, d_{17}$   | -0.6812 , +2.2251 |
| $c_{27}, d_{27}$   | -1.0944 , +2.2414 |
| $c_{37}, d_{37}$   | -0.9237 , +0.5502 |
| $c_{47}, d_{47}$   | -2.9260 , +2.4408 |
| $c_{57}, d_{57}$   | -1.1165 , +1.4203 |
| $c_{67}, d_{67}$   | -1.5937 , +1.6342 |
| $c_{77}, d_{77}$   | -0.9852 , +0.4038 |
| $c_{87}, d_{87}$   | -0.0652 , +0.1230 |
| $c_{97}, d_{97}$   | +0.1024 , +0.1829 |
| $c_{107}, d_{107}$ | +0.0235 , -0.2609 |
| $c_{18}, d_{18}$   | +0.1230 , -0.5690 |
| $c_{28}, d_{28}$   | -1.9158 , +2.6315 |
| $c_{38}, d_{38}$   | -0.6818 , +1.1658 |
| $c_{48}, d_{48}$   | -2.2363 , +2.1457 |
| $c_{58}, d_{58}$   | -1.0315 , +1.2432 |
| $c_{68}, d_{68}$   | -1.5580 , +1.6167 |
| $c_{78}, d_{78}$   | -0.9097 , +0.8465 |
| $c_{88}, d_{88}$   | +0.0183 , +0.1455 |
| $c_{98}, d_{98}$   | -0.1563 , +0.1954 |
| $c_{108}, d_{108}$ | +0.0397 , -0.1612 |
| $c_{19}, d_{19}$   | -0.0153 , -0.4678 |
| $c_{29}, d_{29}$   | -0.1388 , -0.3429 |
| $c_{39}, d_{39}$   | -0.0774 , +0.7856 |
| $c_{49}, d_{49}$   | -1.1711 , +0.7466 |
| $c_{59}, d_{59}$   | -0.5893 , +0.3654 |

Continued on next page

Table S2 – continued from previous page

---

| Parameters           |                   |
|----------------------|-------------------|
| $c_{69}, d_{69}$     | -0.6287 , +0.6608 |
| $c_{79}, d_{79}$     | -0.4155 , +0.5244 |
| $c_{89}, d_{89}$     | -0.0574 , +0.0911 |
| $c_{99}, d_{99}$     | +0.0768 , +0.2424 |
| $c_{109}, d_{109}$   | -0.0189 , -0.2975 |
| $c_{110}, d_{110}$   | -0.1974 , +0.0841 |
| $c_{210}, d_{210}$   | +0.0411 , -0.0292 |
| $c_{310}, d_{310}$   | +0.1450 , +0.1151 |
| $c_{410}, d_{410}$   | -0.0852 , +0.3715 |
| $c_{510}, d_{510}$   | +0.1086 , +0.0398 |
| $c_{610}, d_{610}$   | -0.1962 , +0.2349 |
| $c_{710}, d_{710}$   | -0.0550 , +0.0850 |
| $c_{810}, d_{810}$   | -0.1627 , +0.0285 |
| $c_{910}, d_{910}$   | +0.0248 , -0.0423 |
| $c_{1010}, d_{1010}$ | -0.0495 , +0.0963 |

---

Table S3: Parameters (in  $\text{cm}^{-1}$ ) used to fit by Fourier series the two-dimensional torsional potential for CRC2 (including coupling parameters).

| Parameters |            |
|------------|------------|
| $a_0$      | +1617.9965 |
| $a_1$      | -58.0898   |
| $a_2$      | -557.3912  |
| $a_3$      | +118.8347  |
| $a_4$      | -20.4812   |
| $a_5$      | +11.0135   |
| $a_6$      | +6.4386    |
| $a_7$      | +0.5664    |
| $a_8$      | -0.6256    |
| $a_9$      | -0.0998    |
| $a_{10}$   | -0.1262    |
| $b_1$      | +105.4562  |
| $b_2$      | -306.9214  |
| $b_3$      | -136.6444  |
| $b_4$      | +28.2825   |
| $b_5$      | +9.7861    |
| $b_6$      | +6.3942    |
| $b_7$      | -2.9992    |
| $b_8$      | -1.1916    |
| $b_9$      | +0.2917    |
| $b_{10}$   | +0.2193    |
| $a'_1$     | +69.8061   |
| $a'_2$     | +474.3082  |
| $a'_3$     | +38.0493   |
| $a'_4$     | -53.0671   |
| $a'_5$     | -5.5665    |
| $a'_6$     | +2.1179    |
| $a'_7$     | +1.4477    |
| $a'_8$     | +0.7076    |
| $a'_9$     | -0.0819    |
| $a'_{10}$  | -0.1771    |
| $b'_1$     | +10.1995   |
| $b'_2$     | -514.3444  |
| $b'_3$     | +85.3679   |

Continued on next page

Table S3 – continued from previous page

| Parameters         |                       |
|--------------------|-----------------------|
| $b'_4$             | +32.7501              |
| $b'_5$             | -0.3031               |
| $b'_6$             | -7.2736               |
| $b'_7$             | +1.3281               |
| $b'_8$             | -0.0540               |
| $b'_9$             | +0.3731               |
| $b'_{10}$          | -0.0075               |
| $c_{11}, d_{11}$   | -96.7885 , -26.2489   |
| $c_{21}, d_{21}$   | +110.3342 , -5.6055   |
| $c_{31}, d_{31}$   | -7.0654 , -10.4786    |
| $c_{41}, d_{41}$   | -2.4678 , +0.4573     |
| $c_{51}, d_{51}$   | +3.0421 , -1.0036     |
| $c_{61}, d_{61}$   | -0.9650 , +1.8910     |
| $c_{71}, d_{71}$   | -0.2744 , +0.4301     |
| $c_{81}, d_{81}$   | +0.2412 , -0.4816     |
| $c_{91}, d_{91}$   | +0.0966 , -0.1173     |
| $c_{101}, d_{101}$ | -0.0137 , +0.1011     |
| $c_{12}, d_{12}$   | +132.0684 , -208.1351 |
| $c_{22}, d_{22}$   | -13.5489 , +9.0599    |
| $c_{32}, d_{32}$   | -7.8923 , +16.6189    |
| $c_{42}, d_{42}$   | +20.9921 , -5.3960    |
| $c_{52}, d_{52}$   | +0.6228 , -2.6006     |
| $c_{62}, d_{62}$   | -1.2977 , -0.8933     |
| $c_{72}, d_{72}$   | -0.0170 , +0.2581     |
| $c_{82}, d_{82}$   | -0.2283 , +0.1041     |
| $c_{92}, d_{92}$   | +0.0792 , -0.0399     |
| $c_{102}, d_{102}$ | +0.0850 , +0.1424     |
| $c_{13}, d_{13}$   | +53.7537 , -78.7624   |
| $c_{23}, d_{23}$   | +66.9632 , -67.7519   |
| $c_{33}, d_{33}$   | +1.8885 , -8.6361     |
| $c_{43}, d_{43}$   | -2.7112 , +1.2670     |
| $c_{53}, d_{53}$   | +2.9892 , -4.0100     |
| $c_{63}, d_{63}$   | -1.4856 , +2.1349     |
| $c_{73}, d_{73}$   | +0.1704 , +0.2554     |
| $c_{83}, d_{83}$   | +0.4759 , -0.5183     |
| $c_{93}, d_{93}$   | -0.1594 , +0.0315     |

Continued on next page

Table S3 – continued from previous page

| Parameters         |                     |
|--------------------|---------------------|
| $c_{103}, d_{103}$ | +0.0111 , +0.1106   |
| $c_{14}, d_{14}$   | +12.7021 , -17.9038 |
| $c_{24}, d_{24}$   | +27.2463 , -25.1241 |
| $c_{34}, d_{34}$   | +7.9232 , -5.6487   |
| $c_{44}, d_{44}$   | +4.7092 , -6.3377   |
| $c_{54}, d_{54}$   | -0.3505 , -0.2609   |
| $c_{64}, d_{64}$   | -0.4476 , +0.2976   |
| $c_{74}, d_{74}$   | +0.6668 , -0.6017   |
| $c_{84}, d_{84}$   | +0.1435 , +0.1011   |
| $c_{94}, d_{94}$   | -0.1121 , +0.0888   |
| $c_{104}, d_{104}$ | +0.0003 , -0.0028   |
| $c_{15}, d_{15}$   | -1.8036 , +2.7684   |
| $c_{25}, d_{25}$   | +12.0761 , -17.4132 |
| $c_{35}, d_{35}$   | +1.7283 , -2.0786   |
| $c_{45}, d_{45}$   | +6.6627 , -5.1407   |
| $c_{55}, d_{55}$   | -0.1910 , +0.6297   |
| $c_{65}, d_{65}$   | -0.7939 , +0.6434   |
| $c_{75}, d_{75}$   | +0.5074 , -0.5641   |
| $c_{85}, d_{85}$   | -0.0127 , -0.0522   |
| $c_{95}, d_{95}$   | -0.2165 , +0.0399   |
| $c_{105}, d_{105}$ | +0.1158 , +0.0361   |
| $c_{16}, d_{16}$   | -0.1837 , +3.1059   |
| $c_{26}, d_{26}$   | +1.9883 , -2.1579   |
| $c_{36}, d_{36}$   | +1.2643 , -1.8779   |
| $c_{46}, d_{46}$   | +2.1736 , -2.1107   |
| $c_{56}, d_{56}$   | +0.4464 , +0.0262   |
| $c_{66}, d_{66}$   | -0.6438 , +0.6233   |
| $c_{76}, d_{76}$   | +0.3045 , -0.3266   |
| $c_{86}, d_{86}$   | -0.0038 , -0.1174   |
| $c_{96}, d_{96}$   | -0.1682 , +0.0420   |
| $c_{106}, d_{106}$ | +0.1057 , -0.0090   |
| $c_{17}, d_{17}$   | +0.2828 , +0.6296   |
| $c_{27}, d_{27}$   | -0.6717 , +1.9227   |
| $c_{37}, d_{37}$   | +0.3286 , -0.3144   |
| $c_{47}, d_{47}$   | -0.7958 , +0.5396   |
| $c_{57}, d_{57}$   | +0.6531 , -0.4571   |

Continued on next page

Table S3 – continued from previous page

| Parameters           |                   |
|----------------------|-------------------|
| $c_{67}, d_{67}$     | -0.6297 , +0.3527 |
| $c_{77}, d_{77}$     | -0.0178 , -0.0989 |
| $c_{87}, d_{87}$     | +0.1611 , -0.0709 |
| $c_{97}, d_{97}$     | -0.0892 , +0.1182 |
| $c_{107}, d_{107}$   | +0.0184 , -0.1256 |
| $c_{18}, d_{18}$     | +0.1753 , -0.4518 |
| $c_{28}, d_{28}$     | -1.5121 , +1.9807 |
| $c_{38}, d_{38}$     | +0.1783 , +0.3114 |
| $c_{48}, d_{48}$     | -1.3799 , +0.8516 |
| $c_{58}, d_{58}$     | +0.5460 , -0.3764 |
| $c_{68}, d_{68}$     | -0.3898 , +0.2800 |
| $c_{78}, d_{78}$     | -0.0177 , -0.0154 |
| $c_{88}, d_{88}$     | +0.2077 , -0.1127 |
| $c_{98}, d_{98}$     | -0.0340 , +0.1401 |
| $c_{108}, d_{108}$   | -0.0490 , -0.0502 |
| $c_{19}, d_{19}$     | -0.2314 , -0.1313 |
| $c_{29}, d_{29}$     | -0.5189 , +0.3013 |
| $c_{39}, d_{39}$     | -0.0495 , +0.4265 |
| $c_{49}, d_{49}$     | -0.8036 , +0.4220 |
| $c_{59}, d_{59}$     | +0.0359 , -0.2622 |
| $c_{69}, d_{69}$     | -0.1265 , +0.1280 |
| $c_{79}, d_{79}$     | +0.0149 , +0.0520 |
| $c_{89}, d_{89}$     | +0.1820 , -0.1788 |
| $c_{99}, d_{99}$     | +0.0421 , +0.1649 |
| $c_{109}, d_{109}$   | -0.0845 , -0.0868 |
| $c_{110}, d_{110}$   | -0.2922 , +0.1018 |
| $c_{210}, d_{210}$   | +0.0383 , +0.1191 |
| $c_{310}, d_{310}$   | -0.1022 , +0.3268 |
| $c_{410}, d_{410}$   | -0.1827 , -0.0440 |
| $c_{510}, d_{510}$   | -0.1387 , -0.0171 |
| $c_{610}, d_{610}$   | +0.0733 , -0.1157 |
| $c_{710}, d_{710}$   | -0.0560 , +0.1543 |
| $c_{810}, d_{810}$   | +0.2141 , -0.1747 |
| $c_{910}, d_{910}$   | -0.0415 , +0.0741 |
| $c_{1010}, d_{1010}$ | -0.0622 , +0.0102 |
| $c'_{11}, d'_{11}$   | -8.7497 , +2.6477 |

Continued on next page

Table S3 – continued from previous page

| Parameters           |                      |
|----------------------|----------------------|
| $c'_{21}, d'_{21}$   | -9.5548 , -8.7925    |
| $c'_{31}, d'_{31}$   | -2.2938 , -5.9322    |
| $c'_{41}, d'_{41}$   | +2.2634 , +2.0010    |
| $c'_{51}, d'_{51}$   | +1.5851 , +0.6256    |
| $c'_{61}, d'_{61}$   | -0.4251 , -0.0887    |
| $c'_{71}, d'_{71}$   | -0.1807 , -0.0776    |
| $c'_{81}, d'_{81}$   | -0.0818 , +0.0777    |
| $c'_{91}, d'_{91}$   | -0.0067 , -0.0264    |
| $c'_{101}, d'_{101}$ | +0.0760 , -0.0460    |
| $c'_{12}, d'_{12}$   | -0.8022 , -25.4287   |
| $c'_{22}, d'_{22}$   | +110.3040 , -67.8798 |
| $c'_{32}, d'_{32}$   | +3.1431 , +3.1181    |
| $c'_{42}, d'_{42}$   | -13.4768 , +5.0009   |
| $c'_{52}, d'_{52}$   | -1.1279 , -0.6724    |
| $c'_{62}, d'_{62}$   | +0.5911 , +1.5567    |
| $c'_{72}, d'_{72}$   | +1.0146 , +0.3168    |
| $c'_{82}, d'_{82}$   | +0.1292 , -0.5636    |
| $c'_{92}, d'_{92}$   | -0.1655 , -0.1649    |
| $c'_{102}, d'_{102}$ | +0.1060 , +0.0622    |
| $c'_{13}, d'_{13}$   | +1.4192 , +11.2411   |
| $c'_{23}, d'_{23}$   | +7.4479 , +16.9094   |
| $c'_{33}, d'_{33}$   | -0.3135 , -3.7194    |
| $c'_{43}, d'_{43}$   | +0.2338 , -0.5262    |
| $c'_{53}, d'_{53}$   | +0.6016 , +0.4629    |
| $c'_{63}, d'_{63}$   | -0.9278 , -1.3436    |
| $c'_{73}, d'_{73}$   | +0.0503 , -0.0458    |
| $c'_{83}, d'_{83}$   | -0.0241 , +0.0734    |
| $c'_{93}, d'_{93}$   | -0.0643 , +0.0732    |
| $c'_{103}, d'_{103}$ | +0.1823 , +0.0679    |
| $c'_{14}, d'_{14}$   | -3.7443 , -4.1941    |
| $c'_{24}, d'_{24}$   | -4.3592 , +8.7777    |
| $c'_{34}, d'_{34}$   | -0.2663 , +0.7048    |
| $c'_{44}, d'_{44}$   | +0.0599 , +0.3569    |
| $c'_{54}, d'_{54}$   | -0.3440 , +0.1233    |
| $c'_{64}, d'_{64}$   | -0.0277 , -0.8121    |
| $c'_{74}, d'_{74}$   | +0.0370 , -0.1189    |

Continued on next page

Table S3 – continued from previous page

| Parameters           |                   |
|----------------------|-------------------|
| $c'_{84}, d'_{84}$   | +0.0093 , -0.0391 |
| $c'_{94}, d'_{94}$   | +0.0002 , +0.1319 |
| $c'_{104}, d'_{104}$ | +0.0536 , +0.0900 |
| $c'_{15}, d'_{15}$   | -0.8451 , -0.9492 |
| $c'_{25}, d'_{25}$   | -3.7579 , -2.7596 |
| $c'_{35}, d'_{35}$   | -0.2966 , -0.6721 |
| $c'_{45}, d'_{45}$   | +1.7160 , +0.8166 |
| $c'_{55}, d'_{55}$   | -0.2819 , -0.1968 |
| $c'_{65}, d'_{65}$   | -0.0716 , +0.3160 |
| $c'_{75}, d'_{75}$   | -0.1259 , -0.0113 |
| $c'_{85}, d'_{85}$   | -0.0392 , -0.1733 |
| $c'_{95}, d'_{95}$   | +0.1147 , +0.1281 |
| $c'_{105}, d'_{105}$ | +0.0279 , +0.0214 |
| $c'_{16}, d'_{16}$   | +0.9958 , +0.8467 |
| $c'_{26}, d'_{26}$   | +1.0404 , +0.0654 |
| $c'_{36}, d'_{36}$   | -0.4479 , -0.1885 |
| $c'_{46}, d'_{46}$   | +0.5556 , +0.6645 |
| $c'_{56}, d'_{56}$   | +0.3034 , -0.1926 |
| $c'_{66}, d'_{66}$   | +0.0462 , -0.0198 |
| $c'_{76}, d'_{76}$   | -0.1376 , -0.0367 |
| $c'_{86}, d'_{86}$   | -0.1440 , -0.0648 |
| $c'_{96}, d'_{96}$   | +0.0994 , +0.0542 |
| $c'_{106}, d'_{106}$ | +0.0048 , +0.0426 |
| $c'_{17}, d'_{17}$   | +0.6416 , +0.7240 |
| $c'_{27}, d'_{27}$   | +1.1282 , +0.6132 |
| $c'_{37}, d'_{37}$   | +0.3071 , +0.1096 |
| $c'_{47}, d'_{47}$   | -0.1572 , +0.1831 |
| $c'_{57}, d'_{57}$   | +0.0780 , +0.0979 |
| $c'_{67}, d'_{67}$   | +0.0602 , -0.0013 |
| $c'_{77}, d'_{77}$   | -0.0329 , -0.0727 |
| $c'_{87}, d'_{87}$   | -0.0313 , -0.0194 |
| $c'_{97}, d'_{97}$   | +0.0116 , -0.0225 |
| $c'_{107}, d'_{107}$ | +0.0166 , +0.0543 |
| $c'_{18}, d'_{18}$   | -0.0994 , -0.1135 |
| $c'_{28}, d'_{28}$   | +0.0300 , +0.1814 |
| $c'_{38}, d'_{38}$   | +0.3045 , -0.1671 |

Continued on next page



Table S3 – continued from previous page

| Parameters             |                   |
|------------------------|-------------------|
| $c'_{48}, d'_{48}$     | -0.1005 , -0.2131 |
| $c'_{58}, d'_{58}$     | -0.0726 , +0.0795 |
| $c'_{68}, d'_{68}$     | -0.0419 , +0.0723 |
| $c'_{78}, d'_{78}$     | -0.0137 , -0.0854 |
| $c'_{88}, d'_{88}$     | -0.0561 , +0.0020 |
| $c'_{98}, d'_{98}$     | +0.0763 , +0.0120 |
| $c'_{108}, d'_{108}$   | +0.0333 , -0.0160 |
| $c'_{19}, d'_{19}$     | -0.3343 , -0.2236 |
| $c'_{29}, d'_{29}$     | -0.1727 , +0.1928 |
| $c'_{39}, d'_{39}$     | -0.0075 , -0.0489 |
| $c'_{49}, d'_{49}$     | +0.0396 , -0.0375 |
| $c'_{59}, d'_{59}$     | -0.0757 , -0.0096 |
| $c'_{69}, d'_{69}$     | -0.0263 , +0.0437 |
| $c'_{79}, d'_{79}$     | -0.0381 , -0.0669 |
| $c'_{89}, d'_{89}$     | -0.0111 , +0.0126 |
| $c'_{99}, d'_{99}$     | +0.0392 , +0.0179 |
| $c'_{109}, d'_{109}$   | -0.0033 , -0.0655 |
| $c'_{110}, d'_{110}$   | -0.2140 , -0.1697 |
| $c'_{210}, d'_{210}$   | +0.0114 , +0.2076 |
| $c'_{310}, d'_{310}$   | -0.0053 , -0.0468 |
| $c'_{410}, d'_{410}$   | +0.0294 , -0.0078 |
| $c'_{510}, d'_{510}$   | -0.0245 , -0.0285 |
| $c'_{610}, d'_{610}$   | -0.0678 , +0.0791 |
| $c'_{710}, d'_{710}$   | -0.0169 , -0.1104 |
| $c'_{810}, d'_{810}$   | +0.0537 , +0.0636 |
| $c'_{910}, d'_{910}$   | +0.0370 , -0.0468 |
| $c'_{1010}, d'_{1010}$ | -0.0226 , -0.0056 |

Table S4: Parameters (in  $\text{cm}^{-1}$ ) used to fit by Fourier series the two-dimensional torsional potential for CRC3 (including coupling parameters).

| Parameters         |                      |
|--------------------|----------------------|
| $a_0$              | +525.9577            |
| $a_1$              | -216.4556            |
| $a_2$              | -140.1909            |
| $a_3$              | +209.8433            |
| $a_4$              | -15.7680             |
| $a_5$              | +5.6794              |
| $a_6$              | +1.3821              |
| $a_7$              | +0.7912              |
| $a_8$              | +0.1833              |
| $a_9$              | -0.0617              |
| $a_{10}$           | -0.0069              |
| $b_1$              | -129.1291            |
| $b_2$              | +81.2365             |
| $b_3$              | -197.1739            |
| $b_4$              | +26.2454             |
| $b_5$              | -5.1609              |
| $b_6$              | +9.3416              |
| $b_7$              | -2.6084              |
| $b_8$              | +0.5818              |
| $b_9$              | -1.0836              |
| $b_{10}$           | +0.2272              |
| $c_{11}, d_{11}$   | +80.9784 , -104.5749 |
| $c_{21}, d_{21}$   | +82.0394 , +57.9061  |
| $c_{31}, d_{31}$   | +1.7838 , -25.9564   |
| $c_{41}, d_{41}$   | -11.5362 , +7.8094   |
| $c_{51}, d_{51}$   | +0.1847 , -0.2503    |
| $c_{61}, d_{61}$   | +0.4798 , -0.1966    |
| $c_{71}, d_{71}$   | -0.1505 , +0.3154    |
| $c_{81}, d_{81}$   | +0.0371 , -0.0501    |
| $c_{91}, d_{91}$   | +0.0789 , -0.0295    |
| $c_{101}, d_{101}$ | -0.0463 , -0.0254    |
| $c_{12}, d_{12}$   | +95.3199 , -166.6894 |
| $c_{22}, d_{22}$   | -21.5595 , +52.2536  |
| $c_{32}, d_{32}$   | -12.3422 , +10.1463  |

Continued on next page

Table S4 – continued from previous page

| Parameters         |                     |
|--------------------|---------------------|
| $c_{42}, d_{42}$   | +8.7399 , -11.9282  |
| $c_{52}, d_{52}$   | +1.7162 , -0.4338   |
| $c_{62}, d_{62}$   | -0.5763 , +1.0800   |
| $c_{72}, d_{72}$   | -0.6300 , +0.0985   |
| $c_{82}, d_{82}$   | +0.1416 , +0.0989   |
| $c_{92}, d_{92}$   | -0.0167 , +0.1042   |
| $c_{102}, d_{102}$ | -0.0104 , -0.0869   |
| $c_{13}, d_{13}$   | +60.1527 , -80.0550 |
| $c_{23}, d_{23}$   | +14.6980 , -12.6883 |
| $c_{33}, d_{33}$   | +0.1510 , -4.0827   |
| $c_{43}, d_{43}$   | -6.9385 , +4.9751   |
| $c_{53}, d_{53}$   | +5.9567 , -7.6951   |
| $c_{63}, d_{63}$   | -1.6595 , +1.7562   |
| $c_{73}, d_{73}$   | -0.5024 , +0.7207   |
| $c_{83}, d_{83}$   | +0.2174 , -0.0209   |
| $c_{93}, d_{93}$   | +0.0120 , +0.0290   |
| $c_{103}, d_{103}$ | -0.0072 , -0.1817   |
| $c_{14}, d_{14}$   | +9.0860 , -27.0984  |
| $c_{24}, d_{24}$   | +13.6538 , -20.9596 |
| $c_{34}, d_{34}$   | +3.7953 , +2.0840   |
| $c_{44}, d_{44}$   | +9.1703 , -10.1018  |
| $c_{54}, d_{54}$   | -0.1758 , -0.9239   |
| $c_{64}, d_{64}$   | -0.4513 , +0.5014   |
| $c_{74}, d_{74}$   | +0.0048 , -0.2417   |
| $c_{84}, d_{84}$   | +0.0990 , +0.1990   |
| $c_{94}, d_{94}$   | +0.0178 , +0.3025   |
| $c_{104}, d_{104}$ | -0.0465 , -0.2703   |
| $c_{15}, d_{15}$   | -0.9655 , +3.3446   |
| $c_{25}, d_{25}$   | +3.6184 , -5.7508   |
| $c_{35}, d_{35}$   | +0.1480 , -0.4386   |
| $c_{45}, d_{45}$   | +1.9274 , -1.4398   |
| $c_{55}, d_{55}$   | +1.2136 , -1.2028   |
| $c_{65}, d_{65}$   | -0.7482 , +0.5515   |
| $c_{75}, d_{75}$   | +0.0894 , +0.0703   |
| $c_{85}, d_{85}$   | +0.1122 , -0.0238   |
| $c_{95}, d_{95}$   | -0.0972 , +0.0504   |

Continued on next page

Table S4 – continued from previous page

| Parameters         |                   |
|--------------------|-------------------|
| $c_{105}, d_{105}$ | +0.0544 , -0.1247 |
| $c_{16}, d_{16}$   | -1.2120 , +2.8900 |
| $c_{26}, d_{26}$   | +2.3225 , -3.8564 |
| $c_{36}, d_{36}$   | +1.6827 , -1.9103 |
| $c_{46}, d_{46}$   | +4.0459 , -3.6351 |
| $c_{56}, d_{56}$   | -0.7616 , +0.8648 |
| $c_{66}, d_{66}$   | -0.1810 , +0.4903 |
| $c_{76}, d_{76}$   | +0.3833 , -0.3872 |
| $c_{86}, d_{86}$   | -0.2528 , +0.2071 |
| $c_{96}, d_{96}$   | -0.1037 , +0.2141 |
| $c_{106}, d_{106}$ | +0.0162 , -0.0917 |
| $c_{17}, d_{17}$   | +0.0945 , +2.1452 |
| $c_{27}, d_{27}$   | -0.7903 , +1.0363 |
| $c_{37}, d_{37}$   | -0.6912 , -0.2023 |
| $c_{47}, d_{47}$   | -0.4160 , +0.5015 |
| $c_{57}, d_{57}$   | +0.7815 , -0.4901 |
| $c_{67}, d_{67}$   | -0.2781 , +0.4262 |
| $c_{77}, d_{77}$   | +0.1427 , -0.2385 |
| $c_{87}, d_{87}$   | -0.1895 , +0.0984 |
| $c_{97}, d_{97}$   | -0.1120 , -0.0709 |
| $c_{107}, d_{107}$ | +0.2154 , +0.0309 |
| $c_{18}, d_{18}$   | +0.1827 , -0.5053 |
| $c_{28}, d_{28}$   | -0.1557 , +0.3978 |
| $c_{38}, d_{38}$   | +0.3920 , -0.6553 |
| $c_{48}, d_{48}$   | -0.1256 , +0.2796 |
| $c_{58}, d_{58}$   | +0.2199 , -0.1623 |
| $c_{68}, d_{68}$   | -0.5689 , +0.5499 |
| $c_{78}, d_{78}$   | +0.3598 , -0.0358 |
| $c_{88}, d_{88}$   | -0.2829 , +0.0617 |
| $c_{98}, d_{98}$   | -0.3647 , +0.2162 |
| $c_{108}, d_{108}$ | +0.2566 , +0.1441 |
| $c_{19}, d_{19}$   | +0.3810 , -0.1616 |
| $c_{29}, d_{29}$   | -0.5270 , +0.7200 |
| $c_{39}, d_{39}$   | -0.0788 , +0.2280 |
| $c_{49}, d_{49}$   | -0.6862 , +0.5153 |
| $c_{59}, d_{59}$   | +0.3955 , -0.1887 |

Continued on next page

Table S4 – continued from previous page

---

| Parameters           |                   |
|----------------------|-------------------|
| $c_{69}, d_{69}$     | -0.1073 , +0.2228 |
| $c_{79}, d_{79}$     | -0.1456 , +0.0457 |
| $c_{89}, d_{89}$     | -0.0463 , -0.0201 |
| $c_{99}, d_{99}$     | -0.0530 , +0.1083 |
| $c_{109}, d_{109}$   | +0.0512 , +0.0138 |
| $c_{110}, d_{110}$   | +0.0190 , -0.4244 |
| $c_{210}, d_{210}$   | +0.1009 , +0.0094 |
| $c_{310}, d_{310}$   | +0.1167 , +0.0617 |
| $c_{410}, d_{410}$   | -0.3073 , -0.0295 |
| $c_{510}, d_{510}$   | +0.2334 , +0.0340 |
| $c_{610}, d_{610}$   | -0.2634 , +0.1521 |
| $c_{710}, d_{710}$   | -0.0140 , +0.0035 |
| $c_{810}, d_{810}$   | -0.0004 , -0.1032 |
| $c_{910}, d_{910}$   | -0.1351 , +0.2768 |
| $c_{1010}, d_{1010}$ | +0.0455 , -0.0172 |

---

Table S5: Parameters (in  $\text{cm}^{-1}$ ) used to fit by Fourier series the two-dimensional torsional potential for CRC4 (including coupling parameters).

| Parameters         |                       |
|--------------------|-----------------------|
| $a_0$              | +638.4483             |
| $a_1$              | -107.0919             |
| $a_2$              | -169.7664             |
| $a_3$              | +213.8027             |
| $a_4$              | -14.8229              |
| $a_5$              | +5.4566               |
| $a_6$              | +1.1463               |
| $a_7$              | +0.9746               |
| $a_8$              | +0.0665               |
| $a_9$              | -0.1036               |
| $a_{10}$           | +0.0561               |
| $b_1$              | +88.5672              |
| $b_2$              | +76.5103              |
| $b_3$              | -225.1711             |
| $b_4$              | +19.2116              |
| $b_5$              | -4.3115               |
| $b_6$              | +8.7894               |
| $b_7$              | -1.6147               |
| $b_8$              | +0.6977               |
| $b_9$              | -1.0443               |
| $b_{10}$           | -0.0247               |
| $c_{11}, d_{11}$   | -94.7676 , -15.5823   |
| $c_{21}, d_{21}$   | +74.0644 , +26.3690   |
| $c_{31}, d_{31}$   | -0.0446 , -22.5598    |
| $c_{41}, d_{41}$   | -6.0767 , +6.9698     |
| $c_{51}, d_{51}$   | +1.6379 , +0.5029     |
| $c_{61}, d_{61}$   | -0.8911 , +1.1102     |
| $c_{71}, d_{71}$   | -0.0546 , -0.2225     |
| $c_{81}, d_{81}$   | +0.1566 , -0.0524     |
| $c_{91}, d_{91}$   | -0.0900 , +0.1018     |
| $c_{101}, d_{101}$ | -0.0598 , -0.0141     |
| $c_{12}, d_{12}$   | +162.1790 , -250.5826 |
| $c_{22}, d_{22}$   | -103.7707 , +135.9888 |
| $c_{32}, d_{32}$   | -9.0966 , +10.1289    |

Continued on next page

Table S5 – continued from previous page

| Parameters         |                     |
|--------------------|---------------------|
| $c_{42}, d_{42}$   | +14.6685 , -13.5559 |
| $c_{52}, d_{52}$   | +0.3779 , +1.7521   |
| $c_{62}, d_{62}$   | -0.5709 , +1.3760   |
| $c_{72}, d_{72}$   | -0.3653 , +0.1583   |
| $c_{82}, d_{82}$   | -0.0093 , +0.2807   |
| $c_{92}, d_{92}$   | +0.0196 , +0.0553   |
| $c_{102}, d_{102}$ | -0.0855 , -0.0724   |
| $c_{13}, d_{13}$   | +50.4019 , -79.1064 |
| $c_{23}, d_{23}$   | +55.8316 , -55.5163 |
| $c_{33}, d_{33}$   | -0.7502 , -4.2287   |
| $c_{43}, d_{43}$   | -4.2918 , +2.9138   |
| $c_{53}, d_{53}$   | +5.3310 , -6.9805   |
| $c_{63}, d_{63}$   | -2.0159 , +2.1747   |
| $c_{73}, d_{73}$   | -0.1983 , +0.4599   |
| $c_{83}, d_{83}$   | +0.2048 , -0.0600   |
| $c_{93}, d_{93}$   | -0.1272 , +0.1566   |
| $c_{103}, d_{103}$ | -0.0287 , -0.2096   |
| $c_{14}, d_{14}$   | +15.4899 , -27.0314 |
| $c_{24}, d_{24}$   | +18.1384 , -23.2867 |
| $c_{34}, d_{34}$   | +6.6639 , -2.1002   |
| $c_{44}, d_{44}$   | +4.8463 , -4.0463   |
| $c_{54}, d_{54}$   | +0.1002 , -0.9752   |
| $c_{64}, d_{64}$   | -0.4991 , +0.4809   |
| $c_{74}, d_{74}$   | +0.1830 , -0.0538   |
| $c_{84}, d_{84}$   | -0.0091 , +0.0003   |
| $c_{94}, d_{94}$   | -0.0970 , +0.1372   |
| $c_{104}, d_{104}$ | -0.0089 , -0.0903   |
| $c_{15}, d_{15}$   | -2.4055 , +7.1633   |
| $c_{25}, d_{25}$   | +16.2691 , -20.7769 |
| $c_{35}, d_{35}$   | +2.9743 , -3.6922   |
| $c_{45}, d_{45}$   | +3.7028 , -3.2313   |
| $c_{55}, d_{55}$   | -1.2904 , +1.5958   |
| $c_{65}, d_{65}$   | -0.0304 , -0.1798   |
| $c_{75}, d_{75}$   | +0.1740 , -0.1576   |
| $c_{85}, d_{85}$   | +0.0698 , -0.0527   |
| $c_{95}, d_{95}$   | -0.1519 , +0.1116   |

Continued on next page

Table S5 – continued from previous page

| Parameters         |                   |
|--------------------|-------------------|
| $c_{105}, d_{105}$ | +0.0602 , -0.0963 |
| $c_{16}, d_{16}$   | -0.0324 , +2.3329 |
| $c_{26}, d_{26}$   | -0.8330 , +1.5108 |
| $c_{36}, d_{36}$   | +1.8103 , -2.0809 |
| $c_{46}, d_{46}$   | +2.2642 , -2.0505 |
| $c_{56}, d_{56}$   | -0.6481 , +1.1681 |
| $c_{66}, d_{66}$   | -0.1945 , +0.3160 |
| $c_{76}, d_{76}$   | +0.1605 , -0.3523 |
| $c_{86}, d_{86}$   | +0.0448 , -0.0095 |
| $c_{96}, d_{96}$   | -0.1889 , +0.1407 |
| $c_{106}, d_{106}$ | +0.0918 , -0.0315 |
| $c_{17}, d_{17}$   | -0.4378 , +1.5103 |
| $c_{27}, d_{27}$   | -0.9312 , +1.0898 |
| $c_{37}, d_{37}$   | +0.3526 , -0.6055 |
| $c_{47}, d_{47}$   | -0.4300 , +0.1502 |
| $c_{57}, d_{57}$   | +0.1715 , -0.1332 |
| $c_{67}, d_{67}$   | -0.2655 , +0.5583 |
| $c_{77}, d_{77}$   | +0.1211 , -0.3007 |
| $c_{87}, d_{87}$   | -0.0690 , +0.0106 |
| $c_{97}, d_{97}$   | +0.0306 , -0.0482 |
| $c_{107}, d_{107}$ | +0.0119 , +0.0338 |
| $c_{18}, d_{18}$   | -0.0371 , -0.8312 |
| $c_{28}, d_{28}$   | -1.3876 , +2.0274 |
| $c_{38}, d_{38}$   | -0.1390 , +0.2981 |
| $c_{48}, d_{48}$   | -0.7224 , +0.5411 |
| $c_{58}, d_{58}$   | +0.2746 , -0.3134 |
| $c_{68}, d_{68}$   | -0.2851 , +0.3329 |
| $c_{78}, d_{78}$   | +0.0312 , -0.0139 |
| $c_{88}, d_{88}$   | -0.0787 , +0.0006 |
| $c_{98}, d_{98}$   | -0.0645 , +0.0848 |
| $c_{108}, d_{108}$ | +0.0177 , -0.0655 |
| $c_{19}, d_{19}$   | +0.3666 , -0.1965 |
| $c_{29}, d_{29}$   | -0.4858 , +0.4568 |
| $c_{39}, d_{39}$   | +0.0300 , -0.0158 |
| $c_{49}, d_{49}$   | -0.7607 , +0.8032 |
| $c_{59}, d_{59}$   | +0.2445 , -0.2105 |

Continued on next page



Table S5 – continued from previous page

---

| Parameters           |                   |
|----------------------|-------------------|
| $c_{69}, d_{69}$     | -0.2378 , +0.0682 |
| $c_{79}, d_{79}$     | +0.1332 , +0.1946 |
| $c_{89}, d_{89}$     | -0.1997 , -0.0939 |
| $c_{99}, d_{99}$     | +0.1066 , -0.0114 |
| $c_{109}, d_{109}$   | +0.0128 , +0.0272 |
| $c_{110}, d_{110}$   | +0.1683 , -0.2022 |
| $c_{210}, d_{210}$   | -0.0200 , +0.0071 |
| $c_{310}, d_{310}$   | -0.2707 , +0.4605 |
| $c_{410}, d_{410}$   | -0.1151 , -0.1154 |
| $c_{510}, d_{510}$   | -0.2074 , +0.0348 |
| $c_{610}, d_{610}$   | +0.2529 , -0.0033 |
| $c_{710}, d_{710}$   | -0.3012 , +0.1312 |
| $c_{810}, d_{810}$   | +0.2406 , -0.1277 |
| $c_{910}, d_{910}$   | -0.2161 , +0.2246 |
| $c_{1010}, d_{1010}$ | +0.1499 , -0.1509 |

---

Table S6: Parameters (in  $\text{cm}^{-1}$ ) used to fit by Fourier series the two-dimensional torsional potential for CRC5 (including coupling parameters).

| Parameters         |                       |
|--------------------|-----------------------|
| $a_0$              | +861.0770             |
| $a_1$              | -201.0337             |
| $a_2$              | -179.3936             |
| $a_3$              | +218.1258             |
| $a_4$              | -13.7300              |
| $a_5$              | +4.6728               |
| $a_6$              | +1.4225               |
| $a_7$              | +1.2853               |
| $a_8$              | -0.0020               |
| $a_9$              | +0.0321               |
| $a_{10}$           | +0.0695               |
| $b_1$              | +312.6199             |
| $b_2$              | +233.5583             |
| $b_3$              | -143.7110             |
| $b_4$              | +40.6440              |
| $b_5$              | -12.8162              |
| $b_6$              | +0.6016               |
| $b_7$              | -5.0871               |
| $b_8$              | +2.0162               |
| $b_9$              | +1.0893               |
| $b_{10}$           | -0.1145               |
| $c_{11}, d_{11}$   | -340.0809 , +195.0669 |
| $c_{21}, d_{21}$   | +143.8937 , -42.7099  |
| $c_{31}, d_{31}$   | +0.9619 , -33.1350    |
| $c_{41}, d_{41}$   | -7.8941 , +13.6312    |
| $c_{51}, d_{51}$   | +1.8537 , -1.2754     |
| $c_{61}, d_{61}$   | -0.2010 , -0.0003     |
| $c_{71}, d_{71}$   | +0.3385 , +0.0985     |
| $c_{81}, d_{81}$   | -0.0152 , +0.0092     |
| $c_{91}, d_{91}$   | +0.0944 , -0.0025     |
| $c_{101}, d_{101}$ | +0.0871 , +0.1723     |
| $c_{12}, d_{12}$   | +20.1320 , -91.5249   |
| $c_{22}, d_{22}$   | -27.1694 , +23.6238   |
| $c_{32}, d_{32}$   | -10.6070 , +5.6669    |

Continued on next page

Table S6 – continued from previous page

| Parameters         |                       |
|--------------------|-----------------------|
| $c_{42}, d_{42}$   | +14.2559 , -7.6214    |
| $c_{52}, d_{52}$   | +2.6884 , -0.9968     |
| $c_{62}, d_{62}$   | -0.1919 , +0.6067     |
| $c_{72}, d_{72}$   | -0.6674 , +0.4281     |
| $c_{82}, d_{82}$   | -0.1831 , +0.1790     |
| $c_{92}, d_{92}$   | +0.1793 , -0.0393     |
| $c_{102}, d_{102}$ | -0.0558 , +0.1479     |
| $c_{13}, d_{13}$   | -3.0589 , -6.4185     |
| $c_{23}, d_{23}$   | +119.8740 , -137.9558 |
| $c_{33}, d_{33}$   | -5.2989 , -5.6293     |
| $c_{43}, d_{43}$   | -2.5503 , +3.7570     |
| $c_{53}, d_{53}$   | +7.6660 , -8.5054     |
| $c_{63}, d_{63}$   | -2.2382 , +2.2444     |
| $c_{73}, d_{73}$   | -0.7955 , +0.8202     |
| $c_{83}, d_{83}$   | +0.1447 , -0.1330     |
| $c_{93}, d_{93}$   | +0.0279 , +0.0403     |
| $c_{103}, d_{103}$ | -0.0579 , +0.1251     |
| $c_{14}, d_{14}$   | +8.2406 , -12.0184    |
| $c_{24}, d_{24}$   | +64.8583 , -72.7239   |
| $c_{34}, d_{34}$   | +4.7681 , -1.7684     |
| $c_{44}, d_{44}$   | +8.4133 , -8.1271     |
| $c_{54}, d_{54}$   | -0.3341 , +0.0755     |
| $c_{64}, d_{64}$   | -1.1344 , +1.4129     |
| $c_{74}, d_{74}$   | +0.0566 , -0.0835     |
| $c_{84}, d_{84}$   | -0.1588 , +0.0975     |
| $c_{94}, d_{94}$   | -0.0453 , -0.0332     |
| $c_{104}, d_{104}$ | +0.0174 , -0.0383     |
| $c_{15}, d_{15}$   | +3.0673 , -0.5915     |
| $c_{25}, d_{25}$   | +39.2317 , -36.3591   |
| $c_{35}, d_{35}$   | +4.5882 , -3.4998     |
| $c_{45}, d_{45}$   | +7.9795 , -9.7722     |
| $c_{55}, d_{55}$   | -4.9334 , +4.8910     |
| $c_{65}, d_{65}$   | -0.9244 , +1.1396     |
| $c_{75}, d_{75}$   | +0.6124 , -0.6027     |
| $c_{85}, d_{85}$   | -0.2238 , +0.4430     |
| $c_{95}, d_{95}$   | -0.0282 , -0.0974     |

Continued on next page

Table S6 – continued from previous page

| Parameters         |                   |
|--------------------|-------------------|
| $c_{105}, d_{105}$ | +0.0604 , -0.0491 |
| $c_{16}, d_{16}$   | +2.9096 , -5.8997 |
| $c_{26}, d_{26}$   | +3.3039 , +2.4060 |
| $c_{36}, d_{36}$   | +4.7610 , -2.5672 |
| $c_{46}, d_{46}$   | +5.7836 , -6.4343 |
| $c_{56}, d_{56}$   | -5.5300 , +5.4871 |
| $c_{66}, d_{66}$   | -1.1434 , +0.8375 |
| $c_{76}, d_{76}$   | +0.7441 , -0.9992 |
| $c_{86}, d_{86}$   | -0.1428 , +0.5755 |
| $c_{96}, d_{96}$   | -0.0027 , -0.0574 |
| $c_{106}, d_{106}$ | +0.0760 , -0.1491 |
| $c_{17}, d_{17}$   | -0.9141 , +0.8517 |
| $c_{27}, d_{27}$   | -5.0719 , +4.9792 |
| $c_{37}, d_{37}$   | +1.0867 , -1.3103 |
| $c_{47}, d_{47}$   | +2.0197 , -1.3464 |
| $c_{57}, d_{57}$   | -4.0103 , +3.9324 |
| $c_{67}, d_{67}$   | -0.6871 , +0.4304 |
| $c_{77}, d_{77}$   | +0.4269 , -0.7503 |
| $c_{87}, d_{87}$   | -0.1080 , +0.1681 |
| $c_{97}, d_{97}$   | +0.1907 , +0.0749 |
| $c_{107}, d_{107}$ | -0.0943 , -0.1014 |
| $c_{18}, d_{18}$   | -1.5497 , +2.1188 |
| $c_{28}, d_{28}$   | -4.8167 , +2.5343 |
| $c_{38}, d_{38}$   | -0.9653 , +0.4067 |
| $c_{48}, d_{48}$   | +0.9107 , -0.0323 |
| $c_{58}, d_{58}$   | -2.0617 , +2.1738 |
| $c_{68}, d_{68}$   | -0.1383 , +0.1485 |
| $c_{78}, d_{78}$   | +0.2645 , -0.4627 |
| $c_{88}, d_{88}$   | -0.0643 , -0.1069 |
| $c_{98}, d_{98}$   | +0.1880 , +0.1428 |
| $c_{108}, d_{108}$ | -0.0266 , -0.1551 |
| $c_{19}, d_{19}$   | -0.0419 , +2.0701 |
| $c_{29}, d_{29}$   | -0.1975 , -0.7732 |
| $c_{39}, d_{39}$   | -1.2875 , +0.7481 |
| $c_{49}, d_{49}$   | +0.3061 , -0.1178 |
| $c_{59}, d_{59}$   | -0.7518 , +0.8358 |

Continued on next page

Table S6 – continued from previous page

---

| Parameters           |                   |
|----------------------|-------------------|
| $c_{69}, d_{69}$     | +0.2566 , -0.0364 |
| $c_{79}, d_{79}$     | +0.2995 , -0.0946 |
| $c_{89}, d_{89}$     | -0.2759 , -0.2151 |
| $c_{99}, d_{99}$     | +0.2701 , -0.1165 |
| $c_{109}, d_{109}$   | -0.0756 , +0.2570 |
| $c_{110}, d_{110}$   | +0.5583 , -0.4201 |
| $c_{210}, d_{210}$   | +0.7728 , -0.7385 |
| $c_{310}, d_{310}$   | +0.0334 , +0.8740 |
| $c_{410}, d_{410}$   | +0.4958 , -0.7593 |
| $c_{510}, d_{510}$   | -0.3394 , +0.0709 |
| $c_{610}, d_{610}$   | +0.4100 , -0.0832 |
| $c_{710}, d_{710}$   | +0.1245 , +0.1577 |
| $c_{810}, d_{810}$   | +0.0626 , -0.1298 |
| $c_{910}, d_{910}$   | -0.1324 , -0.2286 |
| $c_{1010}, d_{1010}$ | +0.1448 , +0.0818 |

---

Table S7: Cartesian coordinates (em Å) and non-scaled vibrational frequencies (in  $\text{cm}^{-1}$ ) for the 3B-T-A+

| Cartesian Coordinates                          |           |           |           |
|------------------------------------------------|-----------|-----------|-----------|
| Element                                        | X         | Y         | Z         |
| C                                              | -0.971808 | -0.067590 | -1.033474 |
| C                                              | -0.756347 | -0.115184 | 0.448793  |
| C                                              | 0.672632  | -0.198405 | 0.853125  |
| C                                              | 1.227257  | 0.567807  | 1.778477  |
| H                                              | -2.020241 | 0.067986  | -1.348889 |
| H                                              | -1.253633 | 0.746603  | 0.896043  |
| H                                              | -1.316235 | -0.987693 | 0.802588  |
| H                                              | 1.269602  | -0.936971 | 0.336446  |
| H                                              | 2.267820  | 0.464552  | 2.043343  |
| H                                              | 0.661709  | 1.326682  | 2.300982  |
| O                                              | -0.104207 | -0.182934 | -1.852647 |
| Vibrational Frequencies                        |           |           |           |
| 3206.33                                        | 3148.63   | 3113.64   | 3035.77   |
| 2971.72                                        | 2902.73   | 1839.51   | 1722.52   |
| 1446.87                                        | 1407.82   | 1395.91   | 1330.08   |
| 1297.62                                        | 1222.84   | 1143.93   | 1034.51   |
| 1005.18                                        | 968.07    | 952.11    | 868.15    |
| 746.77                                         | 704.32    | 551.19    | 394.74    |
| 227.47                                         | 147.24    | 81.98     |           |
| Energy MPWB1K/6-31+G(d,p) (a.u.): -231.1103623 |           |           |           |

Table S8: Cartesian coordinates (em Å) and non-scaled vibrational frequencies (in  $\text{cm}^{-1}$ ) for the 3B-G+A-

| Cartesian Coordinates                          |           |           |           |
|------------------------------------------------|-----------|-----------|-----------|
| Element                                        | X         | Y         | Z         |
| C                                              | -0.619104 | 0.050937  | -1.016229 |
| C                                              | -0.512219 | 0.033218  | 0.483027  |
| C                                              | 0.919240  | -0.009140 | 0.909682  |
| C                                              | 1.510125  | -1.060302 | 1.457031  |
| H                                              | -0.155232 | -0.809417 | -1.527387 |
| H                                              | -1.023180 | 0.912076  | 0.868752  |
| H                                              | -1.026374 | -0.859841 | 0.840936  |
| H                                              | 1.495400  | 0.889172  | 0.728064  |
| H                                              | 2.553221  | -1.038956 | 1.731389  |
| H                                              | 0.968121  | -1.973747 | 1.657705  |
| O                                              | -1.151021 | 0.920712  | -1.646476 |
| Vibrational Frequencies                        |           |           |           |
| 3207.13                                        | 3130.57   | 3113.70   | 3083.05   |
| 3008.87                                        | 2907.09   | 1837.96   | 1710.22   |
| 1441.68                                        | 1423.64   | 1391.67   | 1305.50   |
| 1270.79                                        | 1223.61   | 1131.43   | 1067.12   |
| 1021.89                                        | 959.39    | 951.59    | 944.04    |
| 804.77                                         | 644.62    | 494.10    | 385.99    |
| 304.92                                         | 84.60     | 59.29     |           |
| Energy MPWB1K/6-31+G(d,p) (a.u.): -231.1101883 |           |           |           |

Table S9: Cartesian coordinates (em Å) and non-scaled vibrational frequencies (in  $\text{cm}^{-1}$ ) for the 3B-G+A+

| Cartesian Coordinates                          |           |           |           |
|------------------------------------------------|-----------|-----------|-----------|
| Element                                        | X         | Y         | Z         |
| C                                              | -0.580138 | -0.311846 | -1.062196 |
| C                                              | -0.441067 | -0.336481 | 0.431896  |
| C                                              | 0.987233  | -0.359759 | 0.863667  |
| C                                              | 1.557916  | 0.577370  | 1.604102  |
| H                                              | 0.082489  | -1.000893 | -1.614054 |
| H                                              | -0.980964 | 0.509761  | 0.846928  |
| H                                              | -0.938725 | -1.250558 | 0.770423  |
| H                                              | 1.578145  | -1.205371 | 0.532918  |
| H                                              | 2.596492  | 0.513508  | 1.888645  |
| H                                              | 1.003401  | 1.436617  | 1.953044  |
| O                                              | -1.353825 | 0.385956  | -1.654388 |
| Vibrational Frequencies                        |           |           |           |
| 3209.44                                        | 3123.13   | 3113.25   | 3087.21   |
| 2980.51                                        | 2897.92   | 1840.57   | 1717.14   |
| 1441.40                                        | 1418.05   | 1403.77   | 1309.43   |
| 1265.23                                        | 1209.87   | 1148.21   | 1052.32   |
| 1020.91                                        | 996.53    | 956.62    | 928.11    |
| 750.32                                         | 621.24    | 504.26    | 409.69    |
| 264.63                                         | 107.23    | 60.69     |           |
| Energy MPWB1K/6-31+G(d,p) (a.u.): -231.1096713 |           |           |           |



Table S10: Cartesian coordinates (in Å) and non-scaled vibrational frequencies (in  $\text{cm}^{-1}$ ) for the 3B-G+C+

| Cartesian Coordinates                          |           |           |           |
|------------------------------------------------|-----------|-----------|-----------|
| Element                                        | X         | Y         | Z         |
| C                                              | -0.718304 | -0.229452 | -0.754833 |
| C                                              | -0.538122 | -0.223987 | 0.731130  |
| C                                              | 0.896707  | -0.272310 | 1.152386  |
| C                                              | 1.920216  | 0.115778  | 0.405875  |
| H                                              | -0.187689 | -1.036552 | -1.287577 |
| H                                              | -1.048271 | 0.644049  | 1.145246  |
| H                                              | -1.053366 | -1.108538 | 1.113865  |
| H                                              | 1.086455  | -0.645833 | 2.149589  |
| H                                              | 2.931704  | 0.061546  | 0.776431  |
| H                                              | 1.790855  | 0.510084  | -0.592469 |
| O                                              | -1.392518 | 0.556879  | -1.359535 |
| Vibrational Frequencies                        |           |           |           |
| 3205.61                                        | 3134.15   | 3113.89   | 3061.56   |
| 2994.01                                        | 2910.22   | 1838.39   | 1838.39   |
| 1429.74                                        | 1423.57   | 1397.39   | 1319.68   |
| 1305.97                                        | 1195.49   | 1100.26   | 1100.26   |
| 1017.45                                        | 989.09    | 955.41    | 937.49    |
| 767.03                                         | 579.79    | 519.54    | 452.86    |
| 230.43                                         | 115.84    | 61.46     |           |
| Energy MPWB1K/6-31+G(d,p) (a.u.): -231.1087717 |           |           |           |

Table S11: Cartesian coordinates (em Å) and non-scaled vibrational frequencies (in  $\text{cm}^{-1}$ ) for the 3B-TC

| Cartesian Coordinates                          |           |           |           |
|------------------------------------------------|-----------|-----------|-----------|
| Element                                        | X         | Y         | Z         |
| C                                              | -1.123916 | 0.054056  | -0.685193 |
| C                                              | -0.790779 | 0.010004  | 0.770919  |
| C                                              | 0.630163  | -0.049037 | 1.220830  |
| C                                              | 1.726878  | -0.070141 | 0.477066  |
| H                                              | -2.209232 | 0.095960  | -0.885759 |
| H                                              | -1.288826 | 0.876366  | 1.218076  |
| H                                              | -1.347956 | -0.839132 | 1.179702  |
| H                                              | 0.738341  | -0.076920 | 2.298354  |
| H                                              | 2.693854  | -0.114159 | 0.954808  |
| H                                              | 1.694345  | -0.044910 | -0.598780 |
| O                                              | -0.349541 | 0.047829  | -1.600663 |
| Vibrational Frequencies                        |           |           |           |
| 3233.63                                        | 3131.89   | 3109.42   | 2996.57   |
| 2972.39                                        | 2886.31   | 1843.17   | 1714.37   |
| 1434.17                                        | 1407.96   | 1395.97   | 1389.30   |
| 1317.86                                        | 1224.87   | 1069.88   | 1044.40   |
| 1026.50                                        | 992.93    | 980.96    | 824.29    |
| 758.19                                         | 746.30    | 513.14    | 391.36    |
| 238.05                                         | 125.54    | 75.88     |           |
| Energy MPWB1K/6-31+G(d,p) (a.u.): -231.1074061 |           |           |           |

Table S12: Cartesian coordinates (em Å) and non-scaled vibrational frequencies (in  $\text{cm}^{-1}$ ) for the TS1-T-A+

| Cartesian Coordinates                          |           |           |           |
|------------------------------------------------|-----------|-----------|-----------|
| Element                                        | X         | Y         | Z         |
| C                                              | -0.728374 | 0.230536  | -1.112923 |
| C                                              | -0.393404 | -0.767770 | -0.045615 |
| C                                              | 0.769337  | -0.382259 | 0.798921  |
| C                                              | 0.741040  | -0.347760 | 2.121249  |
| H                                              | -1.785230 | -0.066037 | -1.724153 |
| H                                              | -1.293369 | -0.937938 | 0.544953  |
| H                                              | -0.210737 | -1.704896 | -0.580178 |
| H                                              | 1.672979  | -0.111799 | 0.270415  |
| H                                              | 1.611067  | -0.066138 | 2.693287  |
| H                                              | -0.151436 | -0.598764 | 2.676904  |
| O                                              | -0.112795 | 1.192493  | -1.425830 |
| H                                              | -2.680132 | -0.351181 | -2.227732 |
| Vibrational Frequencies                        |           |           |           |
| -1340.85                                       | 3208.13   | 3146.82   | 3114.87   |
| 3050.96                                        | 2986.23   | 1902.33   | 1718.66   |
| 1440.91                                        | 1402.01   | 1369.58   | 1327.41   |
| 1295.70                                        | 1226.53   | 1222.51   | 1152.99   |
| 1057.77                                        | 1009.00   | 960.14    | 957.28    |
| 864.37                                         | 801.07    | 704.48    | 546.90    |
| 392.38                                         | 314.60    | 286.00    | 187.90    |
| 100.57                                         | 70.03     |           |           |
| Energy MPWB1K/6-31+G(d,p) (a.u.): -231.5985738 |           |           |           |

Table S13: Cartesian coordinates (em Å) and non-scaled vibrational frequencies (in  $\text{cm}^{-1}$ ) for the TS1-G+A+

| Cartesian Coordinates                          |           |           |           |
|------------------------------------------------|-----------|-----------|-----------|
| Element                                        | X         | Y         | Z         |
| C                                              | -0.363376 | 0.271444  | -1.132147 |
| C                                              | -0.119090 | -0.725955 | -0.036350 |
| C                                              | 1.018746  | -0.314713 | 0.838218  |
| C                                              | 0.906071  | -0.095461 | 2.138314  |
| H                                              | 0.694895  | 0.599778  | -1.734023 |
| H                                              | -1.040333 | -0.864327 | 0.524234  |
| H                                              | 0.122254  | -1.665688 | -0.540273 |
| H                                              | 1.978696  | -0.192932 | 0.353585  |
| H                                              | 1.757700  | 0.196243  | 2.732434  |
| H                                              | -0.038708 | -0.204324 | 2.651216  |
| O                                              | -1.401857 | 0.729913  | -1.467056 |
| H                                              | 1.600156  | 0.842659  | -2.231916 |
| Vibrational Frequencies                        |           |           |           |
| -1359.70                                       | 3212.49   | 3137.73   | 3118.56   |
| 3078.62                                        | 2990.01   | 1902.85   | 1717.74   |
| 1438.95                                        | 1414.57   | 1367.62   | 1367.62   |
| 1271.15                                        | 1259.27   | 1206.97   | 1135.56   |
| 1079.06                                        | 1015.53   | 973.62    | 960.48    |
| 920.22                                         | 824.20    | 624.26    | 495.27    |
| 420.50                                         | 361.59    | 283.48    | 198.54    |
| 91.43                                          | 52.27     |           |           |
| Energy MPWB1K/6-31+G(d,p) (a.u.): -231.5977537 |           |           |           |

Table S14: Cartesian coordinates (em Å) and non-scaled vibrational frequencies (in  $\text{cm}^{-1}$ ) for the TS1-G+A-

| Cartesian Coordinates                          |           |           |           |
|------------------------------------------------|-----------|-----------|-----------|
| Element                                        | X         | Y         | Z         |
| C                                              | -0.635274 | 0.393826  | -0.906304 |
| C                                              | -0.406224 | -0.635775 | 0.166731  |
| C                                              | 0.739036  | -0.216782 | 1.032081  |
| C                                              | 1.920599  | -0.813300 | 1.043919  |
| H                                              | 0.300531  | 0.415581  | -1.759967 |
| H                                              | -1.326111 | -0.737937 | 0.739265  |
| H                                              | -0.176255 | -1.580087 | -0.323885 |
| H                                              | 0.564736  | 0.642801  | 1.665553  |
| H                                              | 2.717348  | -0.463966 | 1.681537  |
| H                                              | 2.128607  | -1.671303 | 0.420985  |
| O                                              | -1.547049 | 1.143088  | -1.000043 |
| H                                              | 1.077044  | 0.399141  | -2.464707 |
| Vibrational Frequencies                        |           |           |           |
| -1397.89                                       | 3212.65   | 3138.36   | 3118.73   |
| 3083.65                                        | 3017.61   | 1901.18   | 1710.46   |
| 1440.83                                        | 1422.09   | 1356.40   | 1305.60   |
| 1279.97                                        | 1262.80   | 1202.95   | 1138.75   |
| 1063.44                                        | 1019.15   | 964.38    | 955.83    |
| 939.87                                         | 857.36    | 644.68    | 488.14    |
| 401.92                                         | 385.36    | 275.13    | 206.50    |
| 76.39                                          | 48.09     |           |           |
| Energy MPWB1K/6-31+G(d,p) (a.u.): -231.5976140 |           |           |           |

Table S15: Cartesian coordinates (em Å) and non-scaled vibrational frequencies (in  $\text{cm}^{-1}$ ) for the TS1-G+C+

| Cartesian Coordinates                          |           |           |           |
|------------------------------------------------|-----------|-----------|-----------|
| Element                                        | X         | Y         | Z         |
| C                                              | -0.494709 | 0.050165  | -0.910703 |
| C                                              | -0.224812 | -0.923426 | 0.194201  |
| C                                              | 0.905785  | -0.505914 | 1.079520  |
| C                                              | 1.402308  | 0.718864  | 1.156125  |
| H                                              | 0.525571  | 0.279720  | -1.618738 |
| H                                              | -1.143278 | -1.077900 | 0.759856  |
| H                                              | 0.023886  | -1.871639 | -0.287485 |
| H                                              | 1.322776  | -1.287241 | 1.700022  |
| H                                              | 2.216887  | 0.946843  | 1.824953  |
| H                                              | 1.021321  | 1.535604  | 0.559306  |
| O                                              | -1.528004 | 0.561020  | -1.184204 |
| H                                              | 1.368517  | 0.433031  | -2.231917 |
| Vibrational Frequencies                        |           |           |           |
| -1395.04                                       | 3209.20   | 3138.28   | 3116.57   |
| 3053.65                                        | 2996.85   | 1901.22   | 1711.89   |
| 1427.02                                        | 1419.33   | 1358.52   | 1310.14   |
| 1302.12                                        | 1278.83   | 1184.78   | 1112.94   |
| 1040.62                                        | 1016.29   | 986.14    | 957.34    |
| 937.68                                         | 819.00    | 577.20    | 534.70    |
| 459.92                                         | 332.81    | 276.70    | 177.08    |
| 113.76                                         | 50.08     |           |           |
| Energy MPWB1K/6-31+G(d,p) (a.u.): -231.5963996 |           |           |           |

Table S16: Cartesian coordinates (em Å) and non-scaled vibrational frequencies (in  $\text{cm}^{-1}$ ) for the TS1-TC

| Cartesian Coordinates                          |           |           |           |
|------------------------------------------------|-----------|-----------|-----------|
| Element                                        | X         | Y         | Z         |
| C                                              | -0.866491 | -0.024835 | -0.896295 |
| C                                              | -0.483457 | -0.940110 | 0.217828  |
| C                                              | 0.643244  | -0.575846 | 1.125978  |
| C                                              | 1.404122  | 0.507264  | 1.090441  |
| H                                              | -1.827448 | -0.499126 | -1.544047 |
| H                                              | -1.400977 | -1.102728 | 0.790482  |
| H                                              | -0.299656 | -1.910602 | -0.251835 |
| H                                              | 0.828951  | -1.315360 | 1.895373  |
| H                                              | 2.188488  | 0.634688  | 1.820444  |
| H                                              | 1.275809  | 1.282349  | 0.354119  |
| O                                              | -0.404322 | 1.018322  | -1.216479 |
| H                                              | -2.652305 | -0.944690 | -2.070260 |
| Vibrational Frequencies                        |           |           |           |
| -1301.59                                       | 3250.86   | 3143.64   | 3113.35   |
| 3012.54                                        | 2984.64   | 1904.00   | 1720.90   |
| 1437.69                                        | 1400.55   | 1390.85   | 1365.79   |
| 1315.52                                        | 1234.83   | 1229.75   | 1099.95   |
| 1066.13                                        | 1021.80   | 977.24    | 973.94    |
| 828.14                                         | 821.54    | 732.20    | 528.69    |
| 400.67                                         | 303.22    | 293.45    | 233.29    |
| 98.98                                          | 62.15     |           |           |
| Energy MPWB1K/6-31+G(d,p) (a.u.): -231.5962652 |           |           |           |

Table S17: Cartesian coordinates (em Å) and non-scaled vibrational frequencies (in  $\text{cm}^{-1}$ ) for the TS2-T+A-

| Cartesian Coordinates                          |           |           |           |
|------------------------------------------------|-----------|-----------|-----------|
| Element                                        | X         | Y         | Z         |
| C                                              | -0.865151 | 0.742642  | -0.858384 |
| C                                              | -0.680918 | -0.358828 | 0.120844  |
| C                                              | 0.664501  | -0.509176 | 0.689518  |
| C                                              | 1.183382  | -1.673264 | 1.061072  |
| H                                              | -1.821101 | 0.733657  | -1.405331 |
| H                                              | -1.448560 | -0.034375 | 1.006935  |
| H                                              | -1.134669 | -1.287131 | -0.218447 |
| H                                              | 1.233111  | 0.403152  | 0.800703  |
| H                                              | 2.173995  | -1.735484 | 1.482959  |
| H                                              | 0.637909  | -2.599799 | 0.950664  |
| O                                              | -0.067410 | 1.622539  | -1.039745 |
| H                                              | -2.164486 | 0.185047  | 1.821814  |
| Vibrational Frequencies                        |           |           |           |
| -1391.00                                       | 3211.00   | 3156.69   | 3116.39   |
| 3070.60                                        | 2925.00   | 1815.87   | 1697.51   |
| 1447.72                                        | 1401.61   | 1374.71   | 1338.42   |
| 1298.57                                        | 1274.46   | 1197.47   | 1141.80   |
| 1041.69                                        | 1013.62   | 987.78    | 951.03    |
| 880.83                                         | 791.12    | 723.41    | 612.83    |
| 405.05                                         | 314.76    | 286.34    | 223.32    |
| 138.52                                         | 100.20    |           |           |
| Energy MPWB1K/6-31+G(d,p) (a.u.): -231.5972301 |           |           |           |



Table S18: Cartesian coordinates (em Å) and non-scaled vibrational frequencies (in  $\text{cm}^{-1}$ ) for the TS2-C-A-

| Cartesian Coordinates                          |           |           |           |
|------------------------------------------------|-----------|-----------|-----------|
| Element                                        | X         | Y         | Z         |
| C                                              | -0.563781 | 0.933543  | -0.660063 |
| C                                              | -0.354570 | -0.181507 | 0.297916  |
| C                                              | 1.004388  | -0.313696 | 0.843890  |
| C                                              | 1.613927  | -1.473159 | 1.060299  |
| H                                              | 0.069189  | 1.823058  | -0.501958 |
| H                                              | -1.089850 | 0.116903  | 1.215072  |
| H                                              | -0.789405 | -1.105785 | -0.069424 |
| H                                              | 1.517920  | 0.607820  | 1.090542  |
| H                                              | 2.609169  | -1.515022 | 1.473557  |
| H                                              | 1.136603  | -2.413823 | 0.827237  |
| O                                              | -1.379778 | 0.914952  | -1.540490 |
| H                                              | -1.796729 | 0.287320  | 2.052831  |
| Vibrational Frequencies                        |           |           |           |
| -1380.62                                       | 3213.92   | 3124.55   | 3115.84   |
| 3095.53                                        | 2903.42   | 1821.11   | 1696.31   |
| 1443.02                                        | 1443.02   | 1388.26   | 1312.92   |
| 1285.21                                        | 1259.06   | 1190.54   | 1157.08   |
| 1058.08                                        | 1033.63   | 1003.76   | 950.50    |
| 935.69                                         | 795.95    | 634.70    | 521.00    |
| 451.11                                         | 296.43    | 289.92    | 230.94    |
| 133.30                                         | 83.37     |           |           |
| Energy MPWB1K/6-31+G(d,p) (a.u.): -231.5964320 |           |           |           |

Table S19: Cartesian coordinates (em Å) and non-scaled vibrational frequencies (in  $\text{cm}^{-1}$ ) for the TS2-C-G+

| Cartesian Coordinates                          |           |           |           |
|------------------------------------------------|-----------|-----------|-----------|
| Element                                        | X         | Y         | Z         |
| C                                              | -0.573286 | 0.506376  | -0.751195 |
| C                                              | -0.354592 | -0.598250 | 0.224052  |
| C                                              | 1.015876  | -0.748360 | 0.753940  |
| C                                              | 1.711486  | 0.231958  | 1.319722  |
| H                                              | 0.143950  | 1.340794  | -0.695967 |
| H                                              | -1.088553 | -0.297539 | 1.145580  |
| H                                              | -0.806592 | -1.514853 | -0.139285 |
| H                                              | 1.464593  | -1.728278 | 0.666487  |
| H                                              | 2.716970  | 0.071388  | 1.674714  |
| H                                              | 1.298556  | 1.221376  | 1.458187  |
| O                                              | -1.474459 | 0.519124  | -1.543823 |
| H                                              | -1.754337 | -0.089120 | 1.977733  |
| Vibrational Frequencies                        |           |           |           |
| -1402.56                                       | 3211.50   | 3140.58   | 3117.40   |
| 3103.40                                        | 2927.26   | 1815.91   | 1684.52   |
| 1427.99                                        | 1391.49   | 1370.14   | 1323.98   |
| 1302.66                                        | 1281.46   | 1166.90   | 1117.61   |
| 1044.56                                        | 1006.87   | 983.17    | 970.08    |
| 948.61                                         | 789.27    | 639.00    | 564.10    |
| 436.19                                         | 318.44    | 297.22    | 207.13    |
| 102.10                                         | 69.35     |           |           |
| Energy MPWB1K/6-31+G(d,p) (a.u.): -231.5943244 |           |           |           |

Table S20: Cartesian coordinates (em Å) and non-scaled vibrational frequencies (in  $\text{cm}^{-1}$ ) for the TS2-T+C+

| Cartesian Coordinates                          |           |           |           |
|------------------------------------------------|-----------|-----------|-----------|
| Element                                        | X         | Y         | Z         |
| C                                              | -0.987870 | 0.319331  | -0.801289 |
| C                                              | -0.706756 | -0.752927 | 0.187327  |
| C                                              | 0.632999  | -0.931605 | 0.772989  |
| C                                              | 1.599259  | -0.022613 | 0.858722  |
| H                                              | -1.961766 | 0.214603  | -1.307853 |
| H                                              | -1.484311 | -0.478537 | 1.079890  |
| H                                              | -1.145505 | -1.688452 | -0.153987 |
| H                                              | 0.809794  | -1.913584 | 1.192086  |
| H                                              | 2.537808  | -0.280460 | 1.324774  |
| H                                              | 1.489421  | 0.972689  | 0.464238  |
| O                                              | -0.279839 | 1.257729  | -1.046841 |
| H                                              | -2.205678 | -0.262864 | 1.896802  |
| Vibrational Frequencies                        |           |           |           |
| -1390.14                                       | 3244.11   | 3140.04   | 3122.04   |
| 3059.10                                        | 2904.99   | 1822.08   | 1690.50   |
| 1437.29                                        | 1404.48   | 1399.86   | 1372.74   |
| 1323.57                                        | 1276.11   | 1182.61   | 1087.90   |
| 1041.52                                        | 1022.43   | 1005.30   | 974.49    |
| 846.54                                         | 808.94    | 745.90    | 608.01    |
| 397.22                                         | 324.28    | 286.46    | 237.85    |
| 128.21                                         | 72.28     |           |           |
| Energy MPWB1K/6-31+G(d,p) (a.u.): -231.5942176 |           |           |           |

Table S21: Cartesian coordinates (em Å) and non-scaled vibrational frequencies (in  $\text{cm}^{-1}$ ) for the TS2-G-C-

| Cartesian Coordinates                          |           |           |           |
|------------------------------------------------|-----------|-----------|-----------|
| Element                                        | X         | Y         | Z         |
| C                                              | -0.696531 | 0.586860  | -0.533167 |
| C                                              | -0.443519 | -0.515631 | 0.421667  |
| C                                              | 0.911459  | -0.648583 | 0.990254  |
| C                                              | 1.993042  | 0.006035  | 0.583948  |
| H                                              | -0.192878 | 1.540581  | -0.310773 |
| H                                              | -1.185413 | -0.246850 | 1.366790  |
| H                                              | -0.876547 | -1.449112 | 0.072319  |
| H                                              | 1.005202  | -1.354717 | 1.804785  |
| H                                              | 2.947092  | -0.156386 | 1.059790  |
| H                                              | 1.974440  | 0.706646  | -0.237331 |
| O                                              | -1.440318 | 0.494929  | -1.473425 |
| H                                              | -1.822026 | -0.092446 | 2.212590  |
| Vibrational Frequencies                        |           |           |           |
| -1469.84                                       | 3214.52   | 3133.27   | 3122.80   |
| 3079.87                                        | 2928.23   | 1812.45   | 1693.57   |
| 1425.82                                        | 1410.94   | 1343.50   | 1322.38   |
| 1307.95                                        | 1274.36   | 1181.44   | 1101.33   |
| 1047.14                                        | 1019.58   | 996.41    | 964.09    |
| 949.06                                         | 823.34    | 609.90    | 553.17    |
| 461.92                                         | 307.88    | 292.64    | 213.98    |
| 105.67                                         | 84.25     |           |           |
| Energy MPWB1K/6-31+G(d,p) (a.u.): -231.5939114 |           |           |           |

Table S22: Cartesian coordinates (em Å) and non-scaled vibrational frequencies (in  $\text{cm}^{-1}$ ) for the TS3-TC

| Cartesian Coordinates                          |           |           |           |
|------------------------------------------------|-----------|-----------|-----------|
| Element                                        | X         | Y         | Z         |
| C                                              | -1.291854 | 0.252873  | -0.380811 |
| C                                              | -0.405608 | -0.957985 | -0.324532 |
| C                                              | 0.970868  | -0.784340 | 0.168771  |
| C                                              | 1.693708  | 0.218849  | 0.608016  |
| H                                              | -2.306616 | 0.041786  | -0.760890 |
| H                                              | -0.934451 | -1.703111 | 0.277065  |
| H                                              | -0.398033 | -1.385265 | -1.331597 |
| H                                              | 1.659328  | -2.005828 | 0.156996  |
| H                                              | 2.717242  | 0.062080  | 0.918344  |
| H                                              | 1.289692  | 1.219837  | 0.671069  |
| O                                              | -0.986431 | 1.364901  | -0.059254 |
| H                                              | 2.112950  | -2.762603 | 0.158731  |
| Vibrational Frequencies                        |           |           |           |
| -1182.44                                       | 3195.66   | 3105.41   | 3010.20   |
| 2980.53                                        | 2893.72   | 1895.03   | 1840.64   |
| 1720.28                                        | 1418.65   | 1401.13   | 1388.44   |
| 1333.02                                        | 1216.46   | 1142.50   | 1035.32   |
| 1027.12                                        | 990.00    | 976.77    | 943.64    |
| 836.27                                         | 729.71    | 727.52    | 727.52    |
| 374.69                                         | 309.22    | 278.28    | 226.80    |
| 120.50                                         | 71.16     |           |           |
| Energy MPWB1K/6-31+G(d,p) (a.u.): -231.5831966 |           |           |           |

Table S23: Cartesian coordinates (em Å) and non-scaled vibrational frequencies (in  $\text{cm}^{-1}$ ) for the TS3-G+A-

| Cartesian Coordinates                          |           |           |           |
|------------------------------------------------|-----------|-----------|-----------|
| Element                                        | X         | Y         | Z         |
| C                                              | -1.075062 | -0.467843 | 0.330753  |
| C                                              | -0.156285 | 0.254870  | -0.620143 |
| C                                              | 1.213456  | 0.386423  | -0.086811 |
| C                                              | 1.897089  | 1.407460  | 0.375462  |
| H                                              | -1.008479 | -0.148284 | 1.383482  |
| H                                              | -0.177315 | -0.263099 | -1.576038 |
| H                                              | -0.578194 | 1.254905  | -0.768863 |
| H                                              | 1.921780  | -0.843427 | -0.046574 |
| H                                              | 2.905247  | 1.291573  | 0.745577  |
| H                                              | 1.477351  | 2.407551  | 0.393675  |
| O                                              | -1.845906 | -1.319296 | -0.006866 |
| H                                              | 2.380175  | -1.584673 | -0.013490 |
| Vibrational Frequencies                        |           |           |           |
| -1151.69                                       | 3175.66   | 3076.39   | 3073.85   |
| 2965.38                                        | 2920.13   | 1965.02   | 1841.73   |
| 1709.78                                        | 1415.80   | 1400.32   | 1392.13   |
| 1263.65                                        | 1195.43   | 1116.62   | 1079.53   |
| 1056.37                                        | 983.10    | 954.36    | 934.15    |
| 928.97                                         | 749.68    | 629.89    | 480.52    |
| 394.64                                         | 334.02    | 266.21    | 197.27    |
| 67.76                                          | 56.51     |           |           |
| Energy MPWB1K/6-31+G(d,p) (a.u.): -231.5830959 |           |           |           |

Table S24: Cartesian coordinates (em Å) and non-scaled vibrational frequencies (in  $\text{cm}^{-1}$ ) for the TS3-G+A+

| Cartesian Coordinates                          |           |           |           |
|------------------------------------------------|-----------|-----------|-----------|
| Element                                        | X         | Y         | Z         |
| C                                              | -0.575110 | -0.596105 | -0.945370 |
| C                                              | -0.513668 | -0.117115 | 0.480015  |
| C                                              | 0.871946  | 0.026495  | 0.966934  |
| C                                              | 1.578596  | 1.060568  | 1.358558  |
| H                                              | 0.149836  | -1.379657 | -1.218173 |
| H                                              | -1.068270 | 0.817776  | 0.559250  |
| H                                              | -1.038511 | -0.863423 | 1.083316  |
| H                                              | 1.569726  | -1.205999 | 1.028485  |
| H                                              | 2.602505  | 0.954393  | 1.685607  |
| H                                              | 1.156665  | 2.059367  | 1.370803  |
| O                                              | -1.360821 | -0.181124 | -1.748294 |
| H                                              | 2.010957  | -1.959170 | 1.089059  |
| Vibrational Frequencies                        |           |           |           |
| -1159.91                                       | 3177.58   | 3079.68   | 3049.96   |
| 2981.91                                        | 2922.37   | 1944.79   | 1842.06   |
| 1713.70                                        | 1415.25   | 1401.37   | 1395.60   |
| 1262.46                                        | 1182.26   | 1124.03   | 1092.54   |
| 1045.77                                        | 996.56    | 981.15    | 925.59    |
| 910.33                                         | 736.63    | 613.40    | 494.91    |
| 400.16                                         | 327.36    | 264.13    | 196.10    |
| 85.11                                          | 55.10     |           |           |
| Energy MPWB1K/6-31+G(d,p) (a.u.): -231.5830725 |           |           |           |

Table S25: Cartesian coordinates (em Å) and non-scaled vibrational frequencies (in  $\text{cm}^{-1}$ ) for the TS3-G+C+

| Cartesian Coordinates                          |           |           |           |
|------------------------------------------------|-----------|-----------|-----------|
| Element                                        | X         | Y         | Z         |
| C                                              | -0.812947 | 0.442779  | -0.666863 |
| C                                              | -0.286527 | -0.874222 | -0.169596 |
| C                                              | 1.101987  | -0.738192 | 0.323154  |
| C                                              | 1.801563  | 0.284283  | 0.759524  |
| H                                              | -0.229346 | 0.902376  | -1.480836 |
| H                                              | -0.947308 | -1.254648 | 0.606414  |
| H                                              | -0.306821 | -1.581140 | -1.002369 |
| H                                              | 1.817182  | -1.951513 | 0.306704  |
| H                                              | 2.826785  | 0.164907  | 1.078153  |
| H                                              | 1.380497  | 1.281363  | 0.829305  |
| O                                              | -1.783686 | 0.987397  | -0.224139 |
| H                                              | 2.286565  | -2.690309 | 0.288192  |
| Vibrational Frequencies                        |           |           |           |
| -1156.36                                       | 3173.79   | 3077.80   | 3072.06   |
| 2996.16                                        | 2920.38   | 1943.42   | 1837.05   |
| 1705.01                                        | 1422.76   | 1403.73   | 1393.65   |
| 1279.08                                        | 1184.49   | 1125.04   | 1064.41   |
| 1041.75                                        | 988.20    | 976.15    | 925.86    |
| 917.15                                         | 786.41    | 593.26    | 479.66    |
| 451.30                                         | 311.39    | 267.03    | 209.81    |
| 74.68                                          | 46.26     |           |           |
| Energy MPWB1K/6-31+G(d,p) (a.u.): -231.5830223 |           |           |           |



Table S26: Cartesian coordinates (em Å) and non-scaled vibrational frequencies (in  $\text{cm}^{-1}$ ) for the TS3-T+A+

| Cartesian Coordinates                          |           |           |           |
|------------------------------------------------|-----------|-----------|-----------|
| Element                                        | X         | Y         | Z         |
| C                                              | -0.977981 | -0.487921 | -0.937657 |
| C                                              | -0.838549 | 0.033212  | 0.464887  |
| C                                              | 0.551846  | 0.191054  | 0.920083  |
| C                                              | 1.238928  | 1.228358  | 1.334079  |
| H                                              | -2.019498 | -0.630959 | -1.271106 |
| H                                              | -1.378755 | 0.984593  | 0.517473  |
| H                                              | -1.391057 | -0.650702 | 1.114829  |
| H                                              | 1.286322  | -1.033603 | 0.919075  |
| H                                              | 2.271550  | 1.137837  | 1.637517  |
| H                                              | 0.796750  | 2.217780  | 1.381541  |
| O                                              | -0.063568 | -0.740203 | -1.667039 |
| H                                              | 1.750231  | -1.763945 | 0.947055  |
| Vibrational Frequencies                        |           |           |           |
| -1122.00                                       | 3174.73   | 3074.10   | 3013.28   |
| 2966.73                                        | 2904.57   | 2025.27   | 1846.14   |
| 1724.16                                        | 1419.94   | 1394.67   | 1391.14   |
| 1313.31                                        | 1202.06   | 1101.43   | 1076.22   |
| 1010.08                                        | 947.83    | 944.43    | 920.89    |
| 852.91                                         | 742.81    | 691.85    | 572.38    |
| 347.74                                         | 320.44    | 258.18    | 155.34    |
| 141.18                                         | 61.70     |           |           |
| Energy MPWB1K/6-31+G(d,p) (a.u.): -231.5823019 |           |           |           |

Table S27: Cartesian coordinates (em Å) and non-scaled vibrational frequencies (in  $\text{cm}^{-1}$ ) for the TS4-T-A+

| Cartesian Coordinates                          |           |           |           |
|------------------------------------------------|-----------|-----------|-----------|
| Element                                        | X         | Y         | Z         |
| C                                              | -0.993113 | -0.670373 | -0.877480 |
| C                                              | -0.834752 | 0.213104  | 0.323090  |
| C                                              | 0.577930  | 0.338863  | 0.793120  |
| C                                              | 1.142244  | 1.470909  | 1.139997  |
| H                                              | -2.013366 | -0.712117 | -1.294457 |
| H                                              | -1.280243 | 1.182823  | 0.101198  |
| H                                              | -1.463582 | -0.224425 | 1.105449  |
| H                                              | 1.147692  | -0.581245 | 0.834040  |
| H                                              | 2.535940  | 1.369040  | 1.575872  |
| H                                              | 0.765510  | 2.482342  | 1.154708  |
| O                                              | -0.110378 | -1.315464 | -1.367883 |
| H                                              | 3.342103  | 1.256921  | 1.816225  |
| Vibrational Frequencies                        |           |           |           |
| -1012.42                                       | 3175.52   | 3125.28   | 3045.31   |
| 2977.62                                        | 2904.31   | 2218.84   | 1839.55   |
| 1672.16                                        | 1412.08   | 1392.87   | 1334.57   |
| 1266.19                                        | 1203.37   | 1101.77   | 1090.27   |
| 1017.14                                        | 939.25    | 932.23    | 920.24    |
| 865.68                                         | 748.54    | 701.18    | 162.46    |
| 406.55                                         | 266.33    | 223.93    |           |
| 137.07                                         | 73.31     |           |           |
| Energy MPWB1K/6-31+G(d,p) (a.u.): -231.5793902 |           |           |           |

Table S28: Cartesian coordinates (em Å) and non-scaled vibrational frequencies (in  $\text{cm}^{-1}$ ) for the TS4-G+A-

| Cartesian Coordinates                          |           |           |           |
|------------------------------------------------|-----------|-----------|-----------|
| Element                                        | X         | Y         | Z         |
| C                                              | -1.081887 | -0.519726 | 0.342427  |
| C                                              | -0.246320 | 0.235044  | -0.653589 |
| C                                              | 1.162668  | 0.378319  | -0.154038 |
| C                                              | 1.697372  | 1.504820  | 0.256111  |
| H                                              | -1.141580 | -0.063390 | 1.344490  |
| H                                              | -0.277593 | -0.297550 | -1.600907 |
| H                                              | -0.692439 | 1.220613  | -0.786468 |
| H                                              | 1.751905  | -0.530986 | -0.122096 |
| H                                              | 3.080954  | 1.411326  | 0.720414  |
| H                                              | 1.298009  | 2.506510  | 0.303360  |
| O                                              | -1.647136 | -1.549008 | 0.104081  |
| H                                              | 3.882699  | 1.304807  | 0.978943  |
| Vibrational Frequencies                        |           |           |           |
| -1020.83                                       | 3176.42   | 3112.04   | 3086.48   |
| 3015.44                                        | 2911.26   | 2208.93   | 1838.55   |
| 1658.82                                        | 1434.52   | 1391.80   | 1286.81   |
| 1258.55                                        | 1199.32   | 1097.91   | 1088.12   |
| 1062.58                                        | 953.62    | 929.90    | 923.61    |
| 919.07                                         | 809.18    | 699.24    | 496.25    |
| 396.90                                         | 336.93    | 225.07    | 179.17    |
| 80.96                                          | 55.40     |           |           |
| Energy MPWB1K/6-31+G(d,p) (a.u.): -231.5790817 |           |           |           |

Table S29: Cartesian coordinates (em Å) and non-scaled vibrational frequencies (in  $\text{cm}^{-1}$ ) for the TS4-G+A+

| Cartesian Coordinates                          |           |           |           |
|------------------------------------------------|-----------|-----------|-----------|
| Element                                        | X         | Y         | Z         |
| C                                              | -0.581261 | -0.692841 | -0.941534 |
| C                                              | -0.543590 | -0.164313 | 0.462647  |
| C                                              | 0.861170  | -0.029908 | 0.969756  |
| C                                              | 1.405055  | 1.101173  | 1.351937  |
| H                                              | 0.085741  | -1.547291 | -1.148004 |
| H                                              | -1.086718 | 0.774846  | 0.498363  |
| H                                              | -1.077816 | -0.888078 | 1.085165  |
| H                                              | 1.451029  | -0.939455 | 1.012193  |
| H                                              | 2.790493  | 1.004100  | 1.809872  |
| H                                              | 1.009011  | 2.104083  | 1.392225  |
| O                                              | -1.282546 | -0.248843 | -1.805520 |
| H                                              | 3.593064  | 0.891730  | 2.063109  |
| Vibrational Frequencies                        |           |           |           |
| -1016.93                                       | 3181.58   | 3102.44   | 3091.78   |
| 2986.10                                        | 2901.30   | 2212.55   | 1840.45   |
| 1668.42                                        | 1425.01   | 1402.40   | 1296.49   |
| 1249.16                                        | 1189.05   | 1109.23   | 1089.73   |
| 1043.91                                        | 995.99    | 933.47    | 920.82    |
| 902.60                                         | 752.25    | 681.15    | 511.59    |
| 408.12                                         | 315.60    | 222.49    | 171.05    |
| 103.10                                         | 57.58     |           |           |
| Energy MPWB1K/6-31+G(d,p) (a.u.): -231.5786816 |           |           |           |

Table S30: Cartesian coordinates (em Å) and non-scaled vibrational frequencies (in  $\text{cm}^{-1}$ ) for the TS4-TC

| Cartesian Coordinates                          |           |           |           |
|------------------------------------------------|-----------|-----------|-----------|
| Element                                        | X         | Y         | Z         |
| C                                              | -1.297857 | 0.194263  | -0.412812 |
| C                                              | -0.413948 | -1.006908 | -0.340678 |
| C                                              | 0.982487  | -0.851577 | 0.174738  |
| C                                              | 1.576785  | 0.240862  | 0.594783  |
| H                                              | -2.307435 | -0.018361 | -0.805057 |
| H                                              | -0.950339 | -1.752353 | 0.254174  |
| H                                              | -0.394694 | -1.439535 | -1.345525 |
| H                                              | 1.548891  | -1.777296 | 0.190455  |
| H                                              | 2.943774  | 0.027980  | 1.027969  |
| H                                              | 1.246890  | 1.261036  | 0.679686  |
| O                                              | -1.003147 | 1.311175  | -0.092042 |
| H                                              | 3.742930  | -0.163061 | 1.268193  |
| Vibrational Frequencies                        |           |           |           |
| -1052.97                                       | 3237.12   | 3087.21   | 3005.77   |
| 2977.52                                        | 2893.85   | 2142.48   | 1842.51   |
| 1671.14                                        | 1410.65   | 1396.88   | 1377.05   |
| 1275.92                                        | 1216.60   | 1118.07   | 1036.77   |
| 1009.31                                        | 969.01    | 951.06    | 932.86    |
| 832.99                                         | 773.99    | 757.73    | 587.41    |
| 421.66                                         | 257.77    | 219.73    | 214.35    |
| 122.59                                         | 88.34     |           |           |
| Energy MPWB1K/6-31+G(d,p) (a.u.): -231.5782805 |           |           |           |

Table S31: Cartesian coordinates (em Å) and non-scaled vibrational frequencies (in  $\text{cm}^{-1}$ ) for the TS4-G+C+

| Cartesian Coordinates                          |           |           |           |
|------------------------------------------------|-----------|-----------|-----------|
| Element                                        | X         | Y         | Z         |
| C                                              | -0.834697 | 0.390366  | -0.641406 |
| C                                              | -0.244156 | -0.903804 | -0.174575 |
| C                                              | 1.166931  | -0.762306 | 0.320843  |
| C                                              | 1.716350  | 0.359829  | 0.724795  |
| H                                              | -0.217280 | 0.956036  | -1.359246 |
| H                                              | -0.889439 | -1.334083 | 0.588788  |
| H                                              | -0.251318 | -1.587203 | -1.027337 |
| H                                              | 1.755687  | -1.671606 | 0.348611  |
| H                                              | 3.100247  | 0.237793  | 1.179781  |
| H                                              | 1.335064  | 1.366765  | 0.799733  |
| O                                              | -1.903942 | 0.808472  | -0.296058 |
| H                                              | 3.898959  | 0.106907  | 1.433831  |
| Vibrational Frequencies                        |           |           |           |
| -1009.83                                       | 3178.11   | 3110.85   | 3067.84   |
| 2994.64                                        | 2909.55   | 2222.40   | 1840.98   |
| 1659.77                                        | 1421.32   | 1396.12   | 1310.84   |
| 1262.31                                        | 1192.70   | 1092.77   | 1073.14   |
| 1036.98                                        | 972.84    | 931.12    | 917.38    |
| 910.13                                         | 767.37    | 643.12    | 537.01    |
| 457.58                                         | 277.26    | 215.74    | 189.61    |
| 107.22                                         | 59.89     |           |           |
| Energy MPWB1K/6-31+G(d,p) (a.u.): -231.5779270 |           |           |           |

Table S32: Cartesian coordinates (em Å) and non-scaled vibrational frequencies (in  $\text{cm}^{-1}$ ) for the TS5-T-A+

| Cartesian Coordinates                          |           |           |           |
|------------------------------------------------|-----------|-----------|-----------|
| Element                                        | X         | Y         | Z         |
| C                                              | -0.851757 | -0.687369 | -0.957943 |
| C                                              | -0.803033 | 0.199236  | 0.248469  |
| C                                              | 0.550468  | 0.291476  | 0.865819  |
| C                                              | 1.111962  | 1.400238  | 1.285622  |
| H                                              | -1.821981 | -0.711474 | -1.481323 |
| H                                              | -1.193254 | 1.180230  | -0.021008 |
| H                                              | -1.525765 | -0.217150 | 0.957842  |
| H                                              | 1.093900  | -0.644726 | 0.955441  |
| H                                              | 2.071507  | 1.568673  | 1.746902  |
| H                                              | 0.359937  | 2.639468  | 1.100053  |
| O                                              | 0.064664  | -1.354311 | -1.348446 |
| H                                              | -0.101584 | 3.348047  | 0.973660  |
| Vibrational Frequencies                        |           |           |           |
| -1048.36                                       | 3192.49   | 3082.84   | 3051.58   |
| 2979.19                                        | 2907.99   | 2146.47   | 1839.25   |
| 1680.34                                        | 1412.95   | 1394.02   | 1337.74   |
| 1241.47                                        | 1199.90   | 1130.31   | 1093.75   |
| 1016.45                                        | 947.41    | 938.08    | 892.38    |
| 856.25                                         | 737.40    | 705.76    | 577.84    |
| 447.48                                         | 264.71    | 246.26    | 176.95    |
| 144.49                                         | 47.62     |           |           |
| Energy MPWB1K/6-31+G(d,p) (a.u.): -231.5800902 |           |           |           |

Table S33: Cartesian coordinates (em Å) and non-scaled vibrational frequencies (in  $\text{cm}^{-1}$ ) for the TS5-G+A-

| Cartesian Coordinates                          |           |           |           |
|------------------------------------------------|-----------|-----------|-----------|
| Element                                        | X         | Y         | Z         |
| C                                              | -1.068713 | -0.529475 | 0.200538  |
| C                                              | -0.078057 | 0.186735  | -0.674602 |
| C                                              | 1.237027  | 0.325225  | 0.027925  |
| C                                              | 1.713592  | 1.436997  | 0.538708  |
| H                                              | -1.271371 | -0.044464 | 1.169806  |
| H                                              | 0.022619  | -0.369483 | -1.602703 |
| H                                              | -0.480192 | 1.175789  | -0.892839 |
| H                                              | 1.817343  | -0.588062 | 0.135470  |
| H                                              | 2.633631  | 1.627158  | 1.067311  |
| H                                              | 0.923956  | 2.650442  | 0.340496  |
| O                                              | -1.611212 | -1.556147 | -0.095619 |
| H                                              | 0.446998  | 3.344266  | 0.197792  |
| Vibrational Frequencies                        |           |           |           |
| -1047.84                                       | 3193.87   | 3094.99   | 3061.98   |
| 3020.72                                        | 2911.79   | 2151.92   | 1837.74   |
| 1664.00                                        | 1433.07   | 1391.10   | 1282.14   |
| 1250.97                                        | 1200.25   | 1122.23   | 1083.36   |
| 1063.75                                        | 945.15    | 944.00    | 912.24    |
| 908.08                                         | 804.61    | 664.42    | 495.78    |
| 437.75                                         | 347.99    | 234.95    | 202.96    |
| 65.01                                          | 56.68     |           |           |
| Energy MPWB1K/6-31+G(d,p) (a.u.): -231.5794746 |           |           |           |



Table S34: Cartesian coordinates (em Å) and non-scaled vibrational frequencies (in  $\text{cm}^{-1}$ ) for the TS5-G+A+

| Cartesian Coordinates                          |           |           |           |
|------------------------------------------------|-----------|-----------|-----------|
| Element                                        | X         | Y         | Z         |
| C                                              | -0.386833 | -0.733214 | -0.985371 |
| C                                              | -0.524644 | -0.173907 | 0.400926  |
| C                                              | 0.796798  | -0.034052 | 1.085372  |
| C                                              | 1.295504  | 1.087030  | 1.551128  |
| H                                              | 0.349711  | -1.547300 | -1.101359 |
| H                                              | -1.063512 | 0.766767  | 0.350711  |
| H                                              | -1.142723 | -0.884937 | 0.957370  |
| H                                              | 1.381652  | -0.945593 | 1.194275  |
| H                                              | 2.227898  | 1.280142  | 2.056353  |
| H                                              | 0.490722  | 2.297975  | 1.388369  |
| O                                              | -1.027546 | -0.358755 | -1.925652 |
| H                                              | 0.004268  | 2.989951  | 1.282310  |
| Vibrational Frequencies                        |           |           |           |
| -1042.67                                       | 3193.11   | 3102.86   | 3050.04   |
| 2984.40                                        | 2894.77   | 2165.64   | 1842.87   |
| 1674.79                                        | 1422.52   | 1405.34   | 1293.71   |
| 1240.62                                        | 1188.58   | 1133.38   | 1087.72   |
| 1048.31                                        | 1000.90   | 940.35    | 901.66    |
| 887.97                                         | 740.36    | 641.85    | 517.71    |
| 446.50                                         | 85.11     | 252.75    | 202.82    |
| 85.11                                          | 57.59     |           |           |
| Energy MPWB1K/6-31+G(d,p) (a.u.): -231.5785707 |           |           |           |

Table S35: Cartesian coordinates (in  $\text{\AA}$ ) and non-scaled vibrational frequencies (in  $\text{cm}^{-1}$ ) for the TS5-G+C+

| Cartesian Coordinates                          |           |           |           |
|------------------------------------------------|-----------|-----------|-----------|
| Element                                        | X         | Y         | Z         |
| C                                              | -0.614564 | 0.315179  | -0.812315 |
| C                                              | -0.188461 | -0.892176 | -0.029262 |
| C                                              | 1.114759  | -0.745831 | 0.691611  |
| C                                              | 1.637245  | 0.374873  | 1.136123  |
| H                                              | 0.197892  | 0.864475  | -1.315174 |
| H                                              | -0.993930 | -1.170271 | 0.648231  |
| H                                              | -0.102908 | -1.705723 | -0.753566 |
| H                                              | 1.668888  | -1.664896 | 0.862922  |
| H                                              | 2.560971  | 0.539924  | 1.666877  |
| H                                              | 0.892834  | 1.622370  | 1.013595  |
| O                                              | -1.756341 | 0.658543  | -0.934410 |
| H                                              | 0.444503  | 2.349708  | 0.964873  |
| Vibrational Frequencies                        |           |           |           |
| -1065.60                                       | 3191.23   | 3066.59   | 3062.29   |
| 2998.01                                        | 2922.83   | 2128.35   | 1839.27   |
| 1665.95                                        | 1415.99   | 1399.85   | 1313.98   |
| 1258.79                                        | 1199.71   | 1152.10   | 1073.73   |
| 1046.06                                        | 986.64    | 954.12    | 954.12    |
| 894.50                                         | 729.46    | 611.28    | 578.24    |
| 457.68                                         | 331.93    | 288.03    | 232.62    |
| 108.87                                         | 69.04     |           |           |
| Energy MPWB1K/6-31+G(d,p) (a.u.): -231.5777716 |           |           |           |

Table S36: Cartesian coordinates (em Å) and non-scaled vibrational frequencies (in  $\text{cm}^{-1}$ ) for the  $\text{H}_2\text{C}=\text{CHCH}_2\dot{\text{C}}\text{O}$

| Cartesian Coordinates                          |           |           |          |
|------------------------------------------------|-----------|-----------|----------|
| Element                                        | X         | Y         | Z        |
| C                                              | -1.058330 | 1.152752  | 1.094796 |
| C                                              | -0.698353 | 0.108616  | 2.126455 |
| C                                              | 0.471777  | 0.485915  | 2.968529 |
| C                                              | 0.441268  | 0.528961  | 4.290910 |
| H                                              | -1.581041 | -0.107030 | 2.722405 |
| H                                              | -0.498817 | -0.788887 | 1.536113 |
| H                                              | 1.375228  | 0.751191  | 2.436819 |
| H                                              | 1.311316  | 0.810307  | 4.863179 |
| H                                              | -0.453324 | 0.283074  | 4.845419 |
| O                                              | -0.390151 | 2.023172  | 0.676416 |
| Vibrational Frequencies                        |           |           |          |
| 3328.42                                        | 3263.34   | 3231.53   | 3196.10  |
| 3115.22                                        | 2023.23   | 1775.89   | 1492.53  |
| 1458.01                                        | 1349.34   | 1311.07   | 1240.86  |
| 1137.12                                        | 1047.28   | 991.12    | 980.32   |
| 877.08                                         | 851.77    | 720.21    | 548.50   |
| 407.77                                         | 204.21    | 142.76    | 73.52    |
| Energy MPWB1K/6-31+G(d,p) (a.u.): -230.4624898 |           |           |          |

Table S37: Cartesian coordinates (em Å) and non-scaled vibrational frequencies (in  $\text{cm}^{-1}$ ) for the  $\text{H}_2\text{C}=\text{CH}\dot{\text{C}}\text{HCOH}$

| Cartesian Coordinates                          |           |           |           |
|------------------------------------------------|-----------|-----------|-----------|
| Element                                        | X         | Y         | Z         |
| C                                              | -0.489077 | 0.743249  | 0.518634  |
| C                                              | -0.078528 | -0.479258 | 1.157526  |
| C                                              | 1.131096  | -0.572915 | 1.848287  |
| C                                              | 1.557979  | -1.706316 | 2.465820  |
| H                                              | -1.456718 | 0.720642  | -0.000832 |
| H                                              | -0.733038 | -1.337320 | 1.092430  |
| H                                              | 1.739994  | 0.320362  | 1.876574  |
| H                                              | 2.499045  | -1.740866 | 2.990226  |
| H                                              | 0.965095  | -2.608842 | 2.449403  |
| O                                              | 0.171631  | 1.765739  | 0.531291  |
| Vibrational Frequencies                        |           |           |           |
| 3344.16                                        | 3270.04   | 3262.06   | 3238.44   |
| 3061.73                                        | 1747.77   | 1583.04   | 1516.69   |
| 1453.00                                        | 1388.02   | 1317.01   | 1238.48   |
| 1085.65                                        | 1055.50   | 1027.70   | 951.67    |
| 927.81                                         | 782.23    | 763.17    | 606.16    |
| 399.37                                         | 264.54    | 209.41    | 179.41    |
| Energy MPWB1K/6-31+G(d,p) (a.u.): -230.4804561 |           |           |           |

Table S38: Cartesian coordinates (em Å) and non-scaled vibrational frequencies (in  $\text{cm}^{-1}$ ) for the  $\text{H}_2\text{C}=\dot{\text{C}}\text{CH}_2\text{COH} + \text{H}_2$

| Cartesian Coordinates                          |           |           |          |
|------------------------------------------------|-----------|-----------|----------|
| Element                                        | X         | Y         | Z        |
| C                                              | -0.961866 | 1.139431  | 1.425525 |
| C                                              | -0.054584 | -0.063838 | 1.490318 |
| C                                              | 1.300182  | 0.161871  | 1.986666 |
| C                                              | 2.073881  | 1.112354  | 2.432457 |
| H                                              | -1.973050 | 0.914142  | 1.043826 |
| H                                              | -0.571542 | -0.811804 | 2.097693 |
| H                                              | -0.033749 | -0.493145 | 0.484900 |
| H                                              | 3.094042  | 0.916686  | 2.733975 |
| H                                              | 1.712142  | 2.133017  | 2.513497 |
| O                                              | -0.666296 | 2.253728  | 1.744249 |
| Vibrational Frequencies                        |           |           |          |
| 3271.10                                        | 3171.56   | 3127.58   | 3093.88  |
| 2997.68                                        | 1910.74   | 1821.04   | 1462.07  |
| 1445.08                                        | 1428.99   | 1354.54   | 1255.59  |
| 1065.18                                        | 1034.30   | 1004.74   | 943.11   |
| 865.66                                         | 741.28    | 733.15    | 459.60   |
| 353.44                                         | 190.51    | 155.38    | 123.22   |
| Energy MPWB1K/6-31+G(d,p) (a.u.): -230.4308316 |           |           |          |

Table S39: Cartesian coordinates (em Å) and non-scaled vibrational frequencies (in  $\text{cm}^{-1}$ ) for the trans-H $\overset{\circ}{\text{C}}=\text{CHCH}_2\text{COH}$

| Cartesian Coordinates                          |           |           |           |
|------------------------------------------------|-----------|-----------|-----------|
| Element                                        | X         | Y         | Z         |
| C                                              | -0.250583 | -0.915876 | 0.342167  |
| C                                              | -0.099655 | -0.014519 | 1.529818  |
| C                                              | 1.318534  | 0.124880  | 1.995226  |
| C                                              | 1.867012  | 1.249785  | 2.363636  |
| H                                              | -1.268007 | -0.963532 | -0.081118 |
| H                                              | -0.551511 | 0.948936  | 1.295804  |
| H                                              | -0.723250 | -0.446670 | 2.319182  |
| H                                              | 1.899133  | -0.790221 | 2.006714  |
| H                                              | 1.585748  | 2.285786  | 2.445088  |
| O                                              | 0.634269  | -1.570951 | -0.130784 |
| Vibrational Frequencies                        |           |           |           |
| 3327.86                                        | 3229.42   | 3162.69   | 3090.82   |
| 3013.26                                        | 1909.46   | 1742.40   | 1464.82   |
| 1444.57                                        | 1380.22   | 1292.73   | 1238.93   |
| 1116.29                                        | 1052.02   | 951.17    | 902.34    |
| 849.39                                         | 763.28    | 723.68    | 619.51    |
| 375.19                                         | 232.84    | 148.27    | 77.90     |
| Energy MPWB1K/6-31+G(d,p) (a.u.): -230.4242626 |           |           |           |

Table S40: Cartesian coordinates (in  $\text{\AA}$ ) and non-scaled vibrational frequencies (in  $\text{cm}^{-1}$ ) for the cis-H $\dot{\text{C}}=\text{CHCH}_2\text{COH}$

| Cartesian Coordinates                          |           |           |           |
|------------------------------------------------|-----------|-----------|-----------|
| Element                                        | X         | Y         | Z         |
| C                                              | -0.092208 | -0.920267 | 0.395308  |
| C                                              | 0.100096  | -0.034123 | 1.586984  |
| C                                              | 1.517717  | 0.038862  | 2.048527  |
| C                                              | 2.114761  | 1.125946  | 2.452942  |
| H                                              | -1.110737 | -0.922679 | -0.027146 |
| H                                              | -0.301729 | 0.953068  | 1.362857  |
| H                                              | -0.544426 | -0.440988 | 2.373099  |
| H                                              | 2.070531  | -0.898428 | 2.023034  |
| H                                              | 3.088215  | 1.399487  | 2.819189  |
| O                                              | 0.763536  | -1.610620 | -0.082656 |
| Vibrational Frequencies                        |           |           |           |
| 3342.23                                        | 3172.09   | 3165.32   | 3090.29   |
| 3018.34                                        | 1907.35   | 1753.14   | 1465.42   |
| 1446.69                                        | 1387.01   | 1284.10   | 1237.07   |
| 1136.45                                        | 1055.08   | 952.04    | 866.10    |
| 814.20                                         | 750.68    | 732.38    | 594.49    |
| 399.51                                         | 229.90    | 152.43    | 78.34     |
| Energy MPWB1K/6-31+G(d,p) (a.u.): -230.4255248 |           |           |           |

Table S41: Cartesian coordinates (in  $\text{\AA}$ ) and non-scaled vibrational frequencies (in  $\text{cm}^{-1}$ ) for the H $_2$

| Cartesian Coordinates                            |          |          |          |
|--------------------------------------------------|----------|----------|----------|
| Element                                          | X        | Y        | Z        |
| H                                                | 0.000000 | 0.000000 | 0.131093 |
| H                                                | 0.000000 | 0.000000 | 0.868907 |
| Vibrational Frequencies                          |          |          |          |
| 4535.8789                                        |          |          |          |
| Energy MPWB1K/6-31+G(d,p) (a.u.): -1.16489677538 |          |          |          |

Table S42: Cartesian coordinates (in  $\text{\AA}$ ) for the H

| Cartesian Coordinates                        |          |          |          |
|----------------------------------------------|----------|----------|----------|
| Element                                      | X        | Y        | Z        |
| H                                            | 0.000000 | 0.000000 | 0.000000 |
| Energy MPWB1K/6-31+G(d,p) (a.u.): -0.4959576 |          |          |          |

Table S43: Forward classical barriers ( $V^\ddagger$ ), vibrationally adiabatic ground-state barriers ( $V_a^{G,\ddagger}$ ), electronic energy ( $\Delta E$ ), and enthalpy of reaction at 0 K ( $\Delta H_0^0$ ). All values are in kcal/mol.

| Reaction | $V^\ddagger$ | $V_a^{G,\ddagger}$ | $\Delta E$ | $\Delta H_0^0$ |
|----------|--------------|--------------------|------------|----------------|
| (R1)     | 4.86         | 3.36               | -13.22     | -14.62         |
| (R2)     | 5.70         | 4.38               | -24.49     | -26.02         |
| (R3)     | 14.51        | 12.91              | 6.65       | 4.20           |
| (R4)     | 16.90        | 15.32              | 10.77      | 8.46           |
| (R5)     | 16.46        | 14.77              | 9.98       | 7.56           |



Table S44: Harmonic ( $Q_T^{\text{MS-HO}}$ ) and anharmonic ( $Q_T^{\text{MS-T(C)}}$  and  $Q_T^{\text{E2DT}}$ ) total partition functions for the 3-butenal.

| T(K)    | $Q_T^{\text{MS-HO}}$ | $Q_T^{\text{MS-T(C)}}$ | $Q_T^{\text{E2DT}}$ |
|---------|----------------------|------------------------|---------------------|
| 200.00  | 5.356E+07            | 4.629E+07              | 6.224E+07           |
| 300.00  | 6.315E+08            | 5.859E+08              | 7.467E+08           |
| 400.00  | 4.969E+09            | 4.754E+09              | 5.848E+09           |
| 500.00  | 3.188E+10            | 3.054E+10              | 3.679E+10           |
| 600.00  | 1.799E+11            | 1.693E+11              | 2.014E+11           |
| 700.00  | 9.204E+11            | 8.421E+11              | 9.948E+11           |
| 800.00  | 4.340E+12            | 3.838E+12              | 4.513E+12           |
| 900.00  | 1.908E+13            | 1.624E+13              | 1.904E+13           |
| 1000.00 | 7.868E+13            | 6.434E+13              | 7.532E+13           |
| 1100.00 | 3.059E+14            | 2.404E+14              | 2.812E+14           |
| 1200.00 | 1.128E+15            | 8.513E+14              | 9.955E+14           |
| 1300.00 | 3.957E+15            | 2.870E+15              | 3.355E+15           |
| 1400.00 | 1.325E+16            | 9.245E+15              | 1.080E+16           |
| 1500.00 | 4.254E+16            | 2.855E+16              | 3.336E+16           |
| 2000.00 | 8.310E+18            | 4.665E+18              | 5.458E+18           |
| 2500.00 | 7.675E+20            | 3.687E+20              | 4.320E+20           |

<sup>a</sup> MS-OH (ZPE): 55.564 kcal/mol

<sup>b</sup> E2DT (ZPE): 55.563 kcal/mol

<sup>c</sup>  $Q_T^X = Q_{\text{trans}} Q_{\text{elec}} Q_{\text{rovib}}^X$ , where X = MS-HO, MS-T(C) or E2DT

Table S45: Harmonic ( $Q_T^{\text{MS-HO}}$ ) and anharmonic ( $Q_T^{\text{MS-T(C)}}$  and  $Q_T^{\text{E2DT}}$ ) total partition functions for the transition state of CRC1.

| T(K)    | $Q_T^{\text{MS-HO}}$ | $Q_T^{\text{MS-T(C)}}$ | $Q_T^{\text{E2DT}}$ |
|---------|----------------------|------------------------|---------------------|
| 200.00  | 1.435E+08            | 1.372E+08              | 1.550E+08           |
| 300.00  | 2.622E+09            | 2.625E+09              | 2.915E+09           |
| 400.00  | 3.050E+10            | 3.080E+10              | 3.368E+10           |
| 500.00  | 2.758E+11            | 2.741E+11              | 2.966E+11           |
| 600.00  | 2.109E+12            | 2.034E+12              | 2.187E+12           |
| 700.00  | 1.421E+13            | 1.317E+13              | 1.412E+13           |
| 800.00  | 8.597E+13            | 7.643E+13              | 8.167E+13           |
| 900.00  | 4.747E+14            | 4.036E+14              | 4.307E+14           |
| 1000.00 | 2.415E+15            | 1.962E+15              | 2.092E+15           |
| 1100.00 | 1.140E+16            | 8.857E+15              | 9.435E+15           |
| 1200.00 | 5.032E+16            | 3.740E+16              | 3.985E+16           |
| 1300.00 | 2.089E+17            | 1.486E+17              | 1.582E+17           |
| 1400.00 | 8.187E+17            | 5.584E+17              | 5.948E+17           |
| 1500.00 | 3.042E+18            | 1.993E+18              | 2.122E+18           |
| 2000.00 | 1.105E+21            | 5.998E+20              | 6.385E+20           |
| 2500.00 | 1.656E+23            | 7.650E+22              | 8.143E+22           |

<sup>a</sup> MS-OH (ZPE): 54.064 kcal/mol

<sup>b</sup> E2DT (ZPE): 54.065 kcal/mol

<sup>c</sup>  $Q_T^X = Q_{\text{trans}} Q_{\text{elec}} Q_{\text{rovib}}^X$ , where X = MS-HO, MS-T(C) or E2DT

Table S46: Harmonic ( $Q_T^{\text{MS-HO}}$ ) and anharmonic ( $Q_T^{\text{MS-T(C)}}$  and  $Q_T^{\text{E2DT}}$ ) total partition functions for the transition state of CRC2.

| T(K)    | $Q_T^{\text{MS-HO}}$ | $Q_T^{\text{MS-T(C)}}$ | $Q_T^{\text{E2DT}}$ |
|---------|----------------------|------------------------|---------------------|
| 200.00  | 3.926E+07            | 3.614E+07              | 1.848E+07           |
| 300.00  | 6.024E+08            | 5.748E+08              | 3.809E+08           |
| 400.00  | 6.549E+09            | 6.494E+09              | 4.953E+09           |
| 500.00  | 5.796E+10            | 5.952E+10              | 4.945E+10           |
| 600.00  | 4.423E+11            | 4.665E+11              | 4.106E+11           |
| 700.00  | 2.996E+12            | 3.215E+12              | 2.953E+12           |
| 800.00  | 1.829E+13            | 1.982E+13              | 1.881E+13           |
| 900.00  | 1.019E+14            | 1.108E+14              | 1.080E+14           |
| 1000.00 | 5.231E+14            | 5.678E+14              | 5.658E+14           |
| 1100.00 | 2.493E+15            | 2.689E+15              | 2.732E+15           |
| 1200.00 | 1.110E+16            | 1.185E+16              | 1.225E+16           |
| 1300.00 | 4.642E+16            | 4.898E+16              | 5.138E+16           |
| 1400.00 | 1.834E+17            | 1.907E+17              | 2.028E+17           |
| 1500.00 | 6.859E+17            | 7.027E+17              | 7.559E+17           |
| 2000.00 | 2.559E+20            | 2.394E+20              | 2.696E+20           |
| 2500.00 | 3.907E+22            | 3.320E+22              | 3.852E+22           |

<sup>a</sup> MS-OH (ZPE): 54.236 kcal/mol

<sup>b</sup> E2DT (ZPE): 53.901 kcal/mol

<sup>c</sup>  $Q_T^X = Q_{\text{trans}} Q_{\text{elec}} Q_{\text{rovib}}^X$ , where X = MS-HO, MS-T(C) or E2DT

Table S47: Harmonic ( $Q_T^{\text{MS-HO}}$ ) and anharmonic ( $Q_T^{\text{MS-T(C)}}$  and  $Q_T^{\text{E2DT}}$ ) total partition functions for the transition state of CRC3.

| T(K)    | $Q_T^{\text{MS-HO}}$ | $Q_T^{\text{MS-T(C)}}$ | $Q_T^{\text{E2DT}}$ |
|---------|----------------------|------------------------|---------------------|
| 200.00  | 4.410E+08            | 4.002E+08              | 5.595E+08           |
| 300.00  | 6.880E+09            | 6.549E+09              | 8.168E+09           |
| 400.00  | 7.203E+10            | 6.837E+10              | 8.073E+10           |
| 500.00  | 6.064E+11            | 5.598E+11              | 6.422E+11           |
| 600.00  | 4.403E+12            | 3.905E+12              | 4.405E+12           |
| 700.00  | 2.849E+13            | 2.412E+13              | 2.695E+13           |
| 800.00  | 1.670E+14            | 1.347E+14              | 1.495E+14           |
| 900.00  | 8.980E+14            | 6.895E+14              | 7.624E+14           |
| 1000.00 | 4.468E+15            | 3.267E+15              | 3.602E+15           |
| 1100.00 | 2.071E+16            | 1.444E+16              | 1.589E+16           |
| 1200.00 | 9.003E+16            | 5.987E+16              | 6.579E+16           |
| 1300.00 | 3.687E+17            | 2.342E+17              | 2.572E+17           |
| 1400.00 | 1.429E+18            | 8.684E+17              | 9.532E+17           |
| 1500.00 | 5.255E+18            | 3.063E+18              | 3.358E+18           |
| 2000.00 | 1.842E+21            | 8.854E+20              | 9.700E+20           |
| 2500.00 | 2.704E+23            | 1.103E+23              | 1.208E+23           |

<sup>a</sup> MS-OH (ZPE): 53.851 kcal/mol

<sup>b</sup> E2DT (ZPE): 53.896 kcal/mol

<sup>c</sup>  $Q_T^X = Q_{\text{trans}} Q_{\text{elec}} Q_{\text{rovib}}^X$ , where X = MS-HO, MS-T(C) or E2DT

Table S48: Harmonic ( $Q_T^{\text{MS-HO}}$ ) and anharmonic ( $Q_T^{\text{MS-T(C)}}$  and  $Q_T^{\text{E2DT}}$ ) total partition functions for the transition state of CRC4.

| T(K)    | $Q_T^{\text{MS-HO}}$ | $Q_T^{\text{MS-T(C)}}$ | $Q_T^{\text{E2DT}}$ |
|---------|----------------------|------------------------|---------------------|
| 200.00  | 2.082E+08            | 1.881E+08              | 2.299E+08           |
| 300.00  | 3.858E+09            | 3.699E+09              | 4.378E+09           |
| 400.00  | 4.481E+10            | 4.373E+10              | 5.079E+10           |
| 500.00  | 4.039E+11            | 3.906E+11              | 4.494E+11           |
| 600.00  | 3.080E+12            | 2.903E+12              | 3.323E+12           |
| 700.00  | 2.066E+13            | 1.880E+13              | 2.149E+13           |
| 800.00  | 1.245E+14            | 1.089E+14              | 1.244E+14           |
| 900.00  | 6.840E+14            | 5.735E+14              | 6.556E+14           |
| 1000.00 | 3.462E+15            | 2.780E+15              | 3.181E+15           |
| 1100.00 | 1.628E+16            | 1.251E+16              | 1.434E+16           |
| 1200.00 | 7.153E+16            | 5.268E+16              | 6.044E+16           |
| 1300.00 | 2.957E+17            | 2.087E+17              | 2.398E+17           |
| 1400.00 | 1.155E+18            | 7.821E+17              | 9.000E+17           |
| 1500.00 | 4.278E+18            | 2.784E+18              | 3.207E+18           |
| 2000.00 | 1.533E+21            | 8.294E+20              | 9.605E+20           |
| 2500.00 | 2.278E+23            | 1.051E+23              | 1.221E+23           |

<sup>a</sup> MS-OH (ZPE): 53.985 kcal/mol

<sup>b</sup> E2DT (ZPE): 53.983 kcal/mol

<sup>c</sup>  $Q_T^X = Q_{\text{trans}} Q_{\text{elec}} Q_{\text{rovib}}^X$ , where X = MS-HO, MS-T(C) or E2DT

Table S49: Harmonic ( $Q_T^{\text{MS-HO}}$ ) and anharmonic ( $Q_T^{\text{MS-T(C)}}$  and  $Q_T^{\text{E2DT}}$ ) total partition functions for the transition state of CRC5.

| T(K)    | $Q_T^{\text{MS-HO}}$ | $Q_T^{\text{MS-T(C)}}$ | $Q_T^{\text{E2DT}}$ |
|---------|----------------------|------------------------|---------------------|
| 200.00  | 1.585E+08            | 1.459E+08              | 1.530E+08           |
| 300.00  | 2.825E+09            | 2.720E+09              | 2.832E+09           |
| 400.00  | 3.272E+10            | 3.192E+10              | 3.304E+10           |
| 500.00  | 2.969E+11            | 2.867E+11              | 2.966E+11           |
| 600.00  | 2.282E+12            | 2.150E+12              | 2.231E+12           |
| 700.00  | 1.544E+13            | 1.406E+13              | 1.468E+13           |
| 800.00  | 9.375E+13            | 8.219E+13              | 8.627E+13           |
| 900.00  | 5.185E+14            | 4.368E+14              | 4.614E+14           |
| 1000.00 | 2.640E+15            | 2.135E+15              | 2.268E+15           |
| 1100.00 | 1.249E+16            | 9.685E+15              | 1.034E+16           |
| 1200.00 | 5.513E+16            | 4.108E+16              | 4.404E+16           |
| 1300.00 | 2.289E+17            | 1.638E+17              | 1.764E+17           |
| 1400.00 | 8.976E+17            | 6.178E+17              | 6.677E+17           |
| 1500.00 | 3.337E+18            | 2.212E+18              | 2.397E+18           |
| 2000.00 | 1.213E+21            | 6.751E+20              | 7.406E+20           |
| 2500.00 | 1.818E+23            | 8.703E+22              | 9.615E+22           |

<sup>a</sup> MS-OH (ZPE): 53.880 kcal/mol

<sup>b</sup> E2DT (ZPE): 53.897 kcal/mol

<sup>c</sup>  $Q_T^X = Q_{\text{trans}} Q_{\text{elec}} Q_{\text{rovib}}^X$ , where X = MS-HO, MS-T(C) or E2DT

Table S50: Anharmonic factor ( $F^{\text{MS-T(C),Y}}$ ) for 3-Butenal and transition states of each CRC, and the multiplicative coefficient ( $F_{\text{anh}}^{\text{X}}$ ) to account the torsional anharmonicity in the reactions (R1)–(R5)

| T(K) | $F^{\text{MS-T(C),Y}}$ |       |       |        |       |       |       |       |       |       | $F_{\text{anh}}^{\text{MS-T(C)}}$ |      |  |  |  |
|------|------------------------|-------|-------|--------|-------|-------|-------|-------|-------|-------|-----------------------------------|------|--|--|--|
|      | 3-butenal              |       | CRC1  | CRC2,6 | CRC3  | CRC4  | CRC5  | (R1)  | (R2)  | (R3)  | (R4)                              | (R5) |  |  |  |
| 200  | 0.856                  | 0.957 | 0.921 | 0.906  | 0.902 | 0.939 | 1.118 | 1.076 | 1.059 | 1.054 | 1.097                             |      |  |  |  |
| 300  | 0.920                  | 1.002 | 0.955 | 0.949  | 0.957 | 0.979 | 1.090 | 1.038 | 1.032 | 1.041 | 1.064                             |      |  |  |  |
| 400  | 0.949                  | 1.010 | 0.993 | 0.947  | 0.976 | 0.991 | 1.064 | 1.046 | 0.997 | 1.028 | 1.044                             |      |  |  |  |
| 500  | 0.950                  | 0.994 | 1.028 | 0.920  | 0.967 | 0.980 | 1.046 | 1.082 | 0.968 | 1.017 | 1.032                             |      |  |  |  |
| 600  | 0.934                  | 0.964 | 1.056 | 0.884  | 0.942 | 0.956 | 1.032 | 1.130 | 0.946 | 1.009 | 1.023                             |      |  |  |  |
| 700  | 0.908                  | 0.928 | 1.075 | 0.844  | 0.910 | 0.924 | 1.021 | 1.183 | 0.929 | 1.002 | 1.018                             |      |  |  |  |
| 800  | 0.878                  | 0.889 | 1.086 | 0.804  | 0.875 | 0.890 | 1.013 | 1.237 | 0.916 | 0.996 | 1.014                             |      |  |  |  |
| 900  | 0.845                  | 0.850 | 1.090 | 0.765  | 0.839 | 0.855 | 1.006 | 1.289 | 0.905 | 0.992 | 1.011                             |      |  |  |  |
| 1000 | 0.813                  | 0.813 | 1.088 | 0.729  | 0.803 | 0.821 | 1.000 | 1.339 | 0.897 | 0.988 | 1.010                             |      |  |  |  |
| 1100 | 0.781                  | 0.777 | 1.081 | 0.694  | 0.769 | 0.788 | 0.995 | 1.385 | 0.889 | 0.985 | 1.009                             |      |  |  |  |
| 1200 | 0.750                  | 0.743 | 1.071 | 0.662  | 0.737 | 0.756 | 0.991 | 1.428 | 0.883 | 0.983 | 1.009                             |      |  |  |  |
| 1300 | 0.721                  | 0.712 | 1.058 | 0.633  | 0.706 | 0.727 | 0.988 | 1.468 | 0.878 | 0.980 | 1.009                             |      |  |  |  |
| 1400 | 0.693                  | 0.682 | 1.043 | 0.606  | 0.678 | 0.699 | 0.985 | 1.505 | 0.874 | 0.978 | 1.009                             |      |  |  |  |
| 1500 | 0.667                  | 0.655 | 1.027 | 0.581  | 0.651 | 0.673 | 0.982 | 1.540 | 0.871 | 0.976 | 1.010                             |      |  |  |  |
| 2000 | 0.558                  | 0.543 | 0.938 | 0.479  | 0.541 | 0.566 | 0.973 | 1.682 | 0.858 | 0.970 | 1.014                             |      |  |  |  |
| 2500 | 0.478                  | 0.462 | 0.852 | 0.406  | 0.462 | 0.486 | 0.967 | 1.784 | 0.851 | 0.967 | 1.018                             |      |  |  |  |

Table S51: Recrossing ( $\Gamma_j^{\text{CVT}}(T)$ ) coefficient for the individual paths of CRC1.

| T(K)    | Path 1     | Path 2     | Path 3     | Path 4     | Path 5     |
|---------|------------|------------|------------|------------|------------|
| 200.00  | 9.9069E-01 | 9.8834E-01 | 8.1264E-01 | 9.9192E-01 | 5.3518E-01 |
| 300.00  | 9.9507E-01 | 9.9365E-01 | 9.5580E-01 | 9.9455E-01 | 7.1427E-01 |
| 400.00  | 9.9683E-01 | 9.9590E-01 | 9.8182E-01 | 9.9588E-01 | 8.0111E-01 |
| 500.00  | 9.9770E-01 | 9.9703E-01 | 9.8515E-01 | 9.9665E-01 | 8.2903E-01 |
| 600.00  | 9.9819E-01 | 9.9768E-01 | 9.8709E-01 | 9.9713E-01 | 8.3854E-01 |
| 700.00  | 9.9849E-01 | 9.9808E-01 | 9.8831E-01 | 9.9745E-01 | 3.5419E-01 |
| 800.00  | 9.9869E-01 | 9.9835E-01 | 9.8911E-01 | 9.9767E-01 | 3.3512E-01 |
| 900.00  | 9.9882E-01 | 9.9853E-01 | 9.8966E-01 | 9.9783E-01 | 3.2110E-01 |
| 1000.00 | 9.9893E-01 | 9.9867E-01 | 9.9006E-01 | 9.9796E-01 | 3.1041E-01 |
| 1100.00 | 9.9900E-01 | 9.9877E-01 | 9.9035E-01 | 9.9805E-01 | 3.0203E-01 |
| 1200.00 | 9.9906E-01 | 9.9885E-01 | 9.9057E-01 | 9.9813E-01 | 2.9531E-01 |
| 1300.00 | 9.9911E-01 | 9.9891E-01 | 9.9074E-01 | 9.9819E-01 | 2.8982E-01 |
| 1400.00 | 9.9915E-01 | 9.9897E-01 | 9.9087E-01 | 9.9824E-01 | 2.8528E-01 |
| 1500.00 | 9.9918E-01 | 9.9901E-01 | 9.9098E-01 | 9.9829E-01 | 2.8148E-01 |
| 1600.00 | 9.9921E-01 | 9.9904E-01 | 9.9106E-01 | 9.9832E-01 | 2.7825E-01 |
| 1700.00 | 9.9923E-01 | 9.9907E-01 | 9.9112E-01 | 9.9835E-01 | 2.7549E-01 |
| 1800.00 | 9.9925E-01 | 9.9910E-01 | 9.9118E-01 | 9.9838E-01 | 2.7311E-01 |
| 1900.00 | 9.9927E-01 | 9.9912E-01 | 9.9122E-01 | 9.9841E-01 | 2.7105E-01 |
| 2000.00 | 9.9929E-01 | 9.9914E-01 | 9.9126E-01 | 9.9843E-01 | 2.6925E-01 |
| 2500.00 | 9.9934E-01 | 9.9921E-01 | 9.7546E-01 | 9.9851E-01 | 2.6300E-01 |



Table S52: Tunneling ( $\kappa_j^{\text{CVT/SCT}}(T)$ ) coefficient for the individual paths of CRC1.

| T(K) | Path 1 | Path 2 | Path 3 | Path 4 | Path 5 |
|------|--------|--------|--------|--------|--------|
| 200  | 8.258  | 9.100  | 27.530 | 11.240 | 7.359  |
| 300  | 2.522  | 2.650  | 5.148  | 2.905  | 2.409  |
| 400  | 1.678  | 1.730  | 2.663  | 1.820  | 1.640  |
| 500  | 1.392  | 1.421  | 1.915  | 1.467  | 1.373  |
| 600  | 1.258  | 1.276  | 1.586  | 1.305  | 1.246  |
| 700  | 1.183  | 1.196  | 1.411  | 1.216  | 1.176  |
| 800  | 1.137  | 1.147  | 1.305  | 1.161  | 1.132  |
| 900  | 1.107  | 1.115  | 1.236  | 1.126  | 1.103  |
| 1000 | 1.086  | 1.092  | 1.188  | 1.101  | 1.083  |
| 1100 | 1.070  | 1.075  | 1.154  | 1.082  | 1.068  |
| 1200 | 1.059  | 1.063  | 1.128  | 1.069  | 1.057  |
| 1300 | 1.050  | 1.053  | 1.108  | 1.058  | 1.048  |
| 1400 | 1.043  | 1.046  | 1.093  | 1.050  | 1.041  |
| 1500 | 1.037  | 1.040  | 1.081  | 1.043  | 1.036  |
| 2000 | 1.021  | 1.022  | 1.045  | 1.024  | 1.020  |
| 2500 | 1.013  | 1.014  | 1.029  | 1.015  | 1.013  |

Table S53: Recrossing ( $\Gamma_j^{\text{CVT}}(T)$ ) coefficient for the individual paths of CRC2 and CRC6..

| T(K)    | Path 1     | Path 2     | Path 3     | Path 4     | Path 5     |
|---------|------------|------------|------------|------------|------------|
| 200.00  | 8.7170E-01 | 7.3261E-01 | 9.9479E-01 | 6.8977E-01 | 9.6615E-01 |
| 300.00  | 9.5194E-01 | 9.6965E-01 | 9.9951E-01 | 8.8379E-01 | 9.8562E-01 |
| 400.00  | 9.7536E-01 | 9.9298E-01 | 9.9445E-01 | 9.6373E-01 | 9.9332E-01 |
| 500.00  | 9.8743E-01 | 9.9932E-01 | 9.8853E-01 | 9.9816E-01 | 9.9671E-01 |
| 600.00  | 9.9386E-01 | 9.9961E-01 | 9.8342E-01 | 9.2303E-01 | 9.9831E-01 |
| 700.00  | 9.9731E-01 | 9.9622E-01 | 9.7931E-01 | 8.8937E-01 | 9.9911E-01 |
| 800.00  | 9.9910E-01 | 9.9155E-01 | 9.7605E-01 | 8.6246E-01 | 9.9953E-01 |
| 900.00  | 9.9987E-01 | 9.8669E-01 | 9.7345E-01 | 8.4070E-01 | 9.9976E-01 |
| 1000.00 | 9.9994E-01 | 9.8200E-01 | 9.7136E-01 | 8.2282E-01 | 9.9988E-01 |
| 1100.00 | 9.9912E-01 | 9.7758E-01 | 9.6965E-01 | 8.0789E-01 | 9.9995E-01 |
| 1200.00 | 9.9743E-01 | 9.7343E-01 | 9.6824E-01 | 7.9502E-01 | 9.9998E-01 |
| 1300.00 | 9.9502E-01 | 9.6949E-01 | 9.6707E-01 | 7.8369E-01 | 1.0000E+00 |
| 1400.00 | 9.9203E-01 | 9.6572E-01 | 9.6607E-01 | 7.7360E-01 | 1.0000E+00 |
| 1500.00 | 9.8859E-01 | 9.6204E-01 | 9.6522E-01 | 7.6451E-01 | 1.0000E+00 |
| 1600.00 | 9.8485E-01 | 9.5836E-01 | 9.6449E-01 | 7.5624E-01 | 9.9999E-01 |
| 1700.00 | 9.8090E-01 | 9.5452E-01 | 9.4333E-01 | 7.4864E-01 | 9.9998E-01 |
| 1800.00 | 9.7683E-01 | 9.4766E-01 | 8.9761E-01 | 7.4161E-01 | 9.9997E-01 |
| 1900.00 | 9.7271E-01 | 9.3859E-01 | 8.5763E-01 | 7.3505E-01 | 9.9996E-01 |
| 2000.00 | 9.6859E-01 | 9.2950E-01 | 8.2246E-01 | 7.2888E-01 | 9.9994E-01 |
| 2500.00 | 9.4742E-01 | 8.8896E-01 | 6.9616E-01 | 6.9149E-01 | 9.9989E-01 |

Table S54: Tunneling ( $\kappa_j^{\text{CVT/SCT}}(T)$ ) coefficient for the individual paths of CRC2 and CRC6.

| T(K) | Path 1 | Path 2 | Path 3 | Path 4 | Path 5 |
|------|--------|--------|--------|--------|--------|
| 200  | 20.910 | 17.530 | 26.390 | 23.200 | 31.690 |
| 300  | 3.826  | 3.529  | 4.175  | 3.961  | 4.437  |
| 400  | 2.125  | 2.031  | 2.228  | 2.165  | 2.288  |
| 500  | 1.620  | 1.574  | 1.669  | 1.639  | 1.693  |
| 600  | 1.398  | 1.370  | 1.427  | 1.410  | 1.440  |
| 700  | 1.279  | 1.260  | 1.298  | 1.287  | 1.306  |
| 800  | 1.208  | 1.194  | 1.221  | 1.213  | 1.227  |
| 900  | 1.161  | 1.150  | 1.171  | 1.165  | 1.175  |
| 1000 | 1.128  | 1.120  | 1.137  | 1.132  | 1.139  |
| 1100 | 1.105  | 1.098  | 1.112  | 1.108  | 1.114  |
| 1200 | 1.088  | 1.082  | 1.093  | 1.090  | 1.095  |
| 1300 | 1.074  | 1.069  | 1.079  | 1.076  | 1.080  |
| 1400 | 1.064  | 1.060  | 1.067  | 1.065  | 1.069  |
| 1500 | 1.055  | 1.052  | 1.059  | 1.057  | 1.060  |
| 2000 | 1.031  | 1.029  | 1.033  | 1.031  | 1.033  |
| 2500 | 1.020  | 1.018  | 1.021  | 1.020  | 1.021  |

Table S55: Recrossing ( $\Gamma_j^{\text{CVT}}(T)$ ) coefficient for the individual paths of CRC3.

| T(K)    | Path 1     | Path 2     | Path 3     | Path 4     | Path 5     |
|---------|------------|------------|------------|------------|------------|
| 200.00  | 2.5226E-01 | 7.7510E-01 | 1.4873E-01 | 3.4956E-01 | 4.2580E-01 |
| 300.00  | 2.9354E-01 | 9.5021E-01 | 2.5220E-01 | 9.9704E-01 | 6.0397E-01 |
| 400.00  | 9.9907E-01 | 9.8553E-01 | 3.2735E-01 | 9.8566E-01 | 7.2707E-01 |
| 500.00  | 9.9422E-01 | 9.9715E-01 | 3.8152E-01 | 9.7309E-01 | 8.1551E-01 |
| 600.00  | 9.8839E-01 | 9.9994E-01 | 4.2100E-01 | 9.6180E-01 | 8.7981E-01 |
| 700.00  | 9.8292E-01 | 9.9908E-01 | 4.5010E-01 | 9.5232E-01 | 9.2619E-01 |
| 800.00  | 9.7818E-01 | 9.9637E-01 | 4.7181E-01 | 9.4455E-01 | 9.4796E-01 |
| 900.00  | 9.7420E-01 | 9.9301E-01 | 4.8817E-01 | 9.3823E-01 | 9.6021E-01 |
| 1000.00 | 9.7089E-01 | 9.8958E-01 | 5.0066E-01 | 9.3307E-01 | 9.6829E-01 |
| 1100.00 | 9.6814E-01 | 9.8630E-01 | 5.1028E-01 | 9.2884E-01 | 9.7386E-01 |
| 1200.00 | 9.6585E-01 | 9.8327E-01 | 5.1778E-01 | 9.2533E-01 | 9.7785E-01 |
| 1300.00 | 9.6392E-01 | 9.8052E-01 | 5.2368E-01 | 9.2241E-01 | 9.8080E-01 |
| 1400.00 | 9.6230E-01 | 9.7803E-01 | 5.2836E-01 | 9.1995E-01 | 9.8304E-01 |
| 1500.00 | 9.6091E-01 | 9.7577E-01 | 5.3211E-01 | 9.1786E-01 | 9.8477E-01 |
| 1600.00 | 9.5973E-01 | 9.7373E-01 | 5.3514E-01 | 9.1607E-01 | 9.8614E-01 |
| 1700.00 | 9.5870E-01 | 9.6544E-01 | 5.3760E-01 | 9.1453E-01 | 9.8724E-01 |
| 1800.00 | 9.5782E-01 | 9.5421E-01 | 5.3960E-01 | 9.1319E-01 | 9.8813E-01 |
| 1900.00 | 9.5704E-01 | 9.4415E-01 | 5.4125E-01 | 9.1202E-01 | 9.8887E-01 |
| 2000.00 | 9.5636E-01 | 9.3509E-01 | 5.4260E-01 | 9.1099E-01 | 9.8949E-01 |
| 2500.00 | 9.5392E-01 | 9.0078E-01 | 5.4659E-01 | 9.0730E-01 | 9.9146E-01 |

Table S56: Tunneling ( $\kappa_j^{\text{CVT/SCT}}(T)$ ) coefficient for the individual paths of CRC3.

| T(K) | Path 1 | Path 2 | Path 3 | Path 4 | Path 5 |
|------|--------|--------|--------|--------|--------|
| 200  | 55,280 | 41,000 | 43,740 | 41,610 | 31,360 |
| 300  | 4,850  | 4,202  | 4,322  | 4,264  | 3,773  |
| 400  | 2,332  | 2,155  | 2,190  | 2,176  | 2,035  |
| 500  | 1,699  | 1,617  | 1,634  | 1,627  | 1,560  |
| 600  | 1,439  | 1,391  | 1,401  | 1,397  | 1,357  |
| 700  | 1,304  | 1,272  | 1,279  | 1,276  | 1,249  |
| 800  | 1,224  | 1,201  | 1,206  | 1,204  | 1,185  |
| 900  | 1,173  | 1,155  | 1,159  | 1,158  | 1,143  |
| 1000 | 1,138  | 1,124  | 1,127  | 1,126  | 1,114  |
| 1100 | 1,112  | 1,101  | 1,104  | 1,103  | 1,093  |
| 1200 | 1,093  | 1,084  | 1,086  | 1,085  | 1,078  |
| 1300 | 1,079  | 1,071  | 1,073  | 1,072  | 1,066  |
| 1400 | 1,068  | 1,061  | 1,063  | 1,062  | 1,056  |
| 1500 | 1,059  | 1,053  | 1,054  | 1,054  | 1,049  |
| 2000 | 1,033  | 1,029  | 1,030  | 1,030  | 1,027  |
| 2500 | 1,021  | 1,019  | 1,019  | 1,019  | 1,017  |

Table S57: Recrossing ( $\Gamma_j^{\text{CVT}}(T)$ ) coefficient for the individual paths of CRC4.

| T(K)    | Path 1     | Path 2     | Path 3     | Path 4     | Path 5     |
|---------|------------|------------|------------|------------|------------|
| 400.00  | 9.7636E-01 | 6.6995E-01 | 3.0280E-01 | 5.8786E-01 | 2.3251E-01 |
| 500.00  | 9.9327E-01 | 7.6799E-01 | 2.9788E-01 | 6.5676E-01 | 2.2701E-01 |
| 600.00  | 9.9894E-01 | 8.3841E-01 | 2.9525E-01 | 7.0774E-01 | 2.2381E-01 |
| 700.00  | 9.9999E-01 | 8.8892E-01 | 2.9392E-01 | 7.4609E-01 | 2.2194E-01 |
| 800.00  | 9.9902E-01 | 9.2196E-01 | 2.9338E-01 | 7.7528E-01 | 2.2088E-01 |
| 900.00  | 9.9717E-01 | 9.4280E-01 | 2.9333E-01 | 7.9774E-01 | 2.2036E-01 |
| 1000.00 | 9.9503E-01 | 9.5637E-01 | 2.9360E-01 | 8.1521E-01 | 2.2019E-01 |
| 1100.00 | 9.9289E-01 | 9.6555E-01 | 2.9408E-01 | 8.2895E-01 | 2.2025E-01 |
| 1200.00 | 9.9088E-01 | 9.7198E-01 | 2.9469E-01 | 8.3987E-01 | 2.2048E-01 |
| 1300.00 | 9.8903E-01 | 9.7663E-01 | 2.9539E-01 | 8.4867E-01 | 2.2082E-01 |
| 1400.00 | 9.8737E-01 | 9.8008E-01 | 2.9614E-01 | 8.5582E-01 | 2.2123E-01 |
| 1500.00 | 9.8589E-01 | 9.8270E-01 | 2.9692E-01 | 8.6168E-01 | 2.2169E-01 |
| 1600.00 | 9.8457E-01 | 9.8474E-01 | 2.9772E-01 | 8.6654E-01 | 2.2219E-01 |
| 1700.00 | 9.8340E-01 | 9.8635E-01 | 2.9853E-01 | 8.7058E-01 | 2.2271E-01 |
| 1800.00 | 9.8235E-01 | 9.8764E-01 | 2.9934E-01 | 8.7397E-01 | 2.2325E-01 |
| 1900.00 | 9.8142E-01 | 9.8870E-01 | 3.0014E-01 | 8.7406E-01 | 2.2378E-01 |
| 2000.00 | 9.8058E-01 | 9.8957E-01 | 3.0093E-01 | 8.6964E-01 | 2.2433E-01 |
| 2500.00 | 9.7750E-01 | 9.9226E-01 | 3.0467E-01 | 8.5349E-01 | 2.2697E-01 |

Table S58: Tunneling ( $\kappa_j^{\text{CVT/SCT}}(T)$ ) coefficient for the individual paths of CRC4.

| T(K) | Path 1 | Path 2 | Path 3 | Path 4 | Path 5 |
|------|--------|--------|--------|--------|--------|
| 200  | 11.680 | 12.610 | 12.530 | 19.920 | 12.460 |
| 300  | 2.586  | 2.666  | 2.662  | 3.193  | 2.657  |
| 400  | 1.664  | 1.692  | 1.691  | 1.864  | 1.690  |
| 500  | 1.376  | 1.391  | 1.390  | 1.477  | 1.389  |
| 600  | 1.245  | 1.254  | 1.253  | 1.307  | 1.253  |
| 700  | 1.173  | 1.180  | 1.179  | 1.216  | 1.179  |
| 800  | 1.129  | 1.134  | 1.134  | 1.161  | 1.134  |
| 900  | 1.101  | 1.104  | 1.104  | 1.125  | 1.104  |
| 1000 | 1.081  | 1.083  | 1.083  | 1.100  | 1.083  |
| 1100 | 1.066  | 1.068  | 1.068  | 1.081  | 1.068  |
| 1200 | 1.055  | 1.057  | 1.057  | 1.068  | 1.057  |
| 1300 | 1.047  | 1.048  | 1.048  | 1.058  | 1.048  |
| 1400 | 1.040  | 1.042  | 1.041  | 1.049  | 1.041  |
| 1500 | 1.035  | 1.036  | 1.036  | 1.043  | 1.036  |
| 2000 | 1.019  | 1.020  | 1.020  | 1.024  | 1.020  |
| 2500 | 1.012  | 1.013  | 1.013  | 1.015  | 1.013  |

Table S59: Recrossing ( $\Gamma_j^{\text{CVT}}(T)$ ) coefficient for the individual paths of CRC5.

| T(K)    | Path 1     | Path 2     | Path 3     | Path 4     |
|---------|------------|------------|------------|------------|
| 200.00  | 2.6417E-01 | 6.2600E-01 | 2.8102E-01 | 7.5604E-01 |
| 300.00  | 4.2266E-01 | 8.1962E-01 | 4.2217E-01 | 9.1457E-01 |
| 400.00  | 5.3609E-01 | 9.2399E-01 | 5.2057E-01 | 9.6877E-01 |
| 500.00  | 6.1799E-01 | 9.6852E-01 | 5.9157E-01 | 9.8955E-01 |
| 600.00  | 6.7810E-01 | 9.8871E-01 | 6.4400E-01 | 9.9737E-01 |
| 700.00  | 7.2282E-01 | 9.9713E-01 | 6.8326E-01 | 9.9977E-01 |
| 800.00  | 7.5647E-01 | 9.9980E-01 | 7.1296E-01 | 9.9986E-01 |
| 900.00  | 7.8211E-01 | 9.9961E-01 | 7.3567E-01 | 9.9893E-01 |
| 1000.00 | 8.0188E-01 | 9.9754E-01 | 7.5320E-01 | 9.9758E-01 |
| 1100.00 | 8.1730E-01 | 9.9445E-01 | 7.6689E-01 | 9.9612E-01 |
| 1200.00 | 8.2947E-01 | 9.9089E-01 | 7.7768E-01 | 9.9469E-01 |
| 1300.00 | 8.3918E-01 | 9.8718E-01 | 7.8627E-01 | 9.9334E-01 |
| 1400.00 | 8.4701E-01 | 9.8349E-01 | 7.9318E-01 | 9.9211E-01 |
| 1500.00 | 8.5338E-01 | 9.7992E-01 | 7.9878E-01 | 9.9101E-01 |
| 1600.00 | 8.5861E-01 | 9.7651E-01 | 8.0336E-01 | 9.9001E-01 |
| 1700.00 | 8.6294E-01 | 9.7328E-01 | 8.0713E-01 | 9.8912E-01 |
| 1800.00 | 8.6655E-01 | 9.7022E-01 | 8.1025E-01 | 9.8833E-01 |
| 1900.00 | 8.6249E-01 | 9.6733E-01 | 8.1285E-01 | 9.8761E-01 |
| 2000.00 | 8.5850E-01 | 9.6459E-01 | 8.1503E-01 | 9.8698E-01 |
| 2500.00 | 8.4396E-01 | 9.5239E-01 | 8.2180E-01 | 9.8461E-01 |



Table S60: Tunneling ( $\kappa_j^{\text{CVT/SCT}}(T)$ ) coefficient for the individual paths of CRC5.

| T(K) | Path 1 | Path 2 | Path 3 | Path 4 |
|------|--------|--------|--------|--------|
| 200  | 16.540 | 15.520 | 15.880 | 21.370 |
| 300  | 2.941  | 2.883  | 2.878  | 3.291  |
| 400  | 1.782  | 1.765  | 1.760  | 1.894  |
| 500  | 1.436  | 1.427  | 1.425  | 1.491  |
| 600  | 1.282  | 1.277  | 1.275  | 1.315  |
| 700  | 1.199  | 1.195  | 1.194  | 1.221  |
| 800  | 1.148  | 1.146  | 1.145  | 1.165  |
| 900  | 1.115  | 1.113  | 1.112  | 1.127  |
| 1000 | 1.092  | 1.090  | 1.090  | 1.102  |
| 1100 | 1.075  | 1.074  | 1.073  | 1.083  |
| 1200 | 1.063  | 1.062  | 1.061  | 1.069  |
| 1300 | 1.053  | 1.052  | 1.052  | 1.059  |
| 1400 | 1.046  | 1.045  | 1.045  | 1.050  |
| 1500 | 1.040  | 1.039  | 1.039  | 1.044  |
| 2000 | 1.022  | 1.022  | 1.022  | 1.024  |
| 2500 | 1.014  | 1.014  | 1.014  | 1.016  |

Table S61: Representative tunneling energy (RTE) at 200 K and the maxima of the vibrationally adiabatic ground-state potential curves for reaction paths 1–5 of CRC1. All values are in kcal/mol.

| Path   | RTE    | $V_a^G$ |
|--------|--------|---------|
| Path 1 | 57.684 | 59.035  |
| Path 2 | 58.162 | 59.501  |
| Path 3 | 57.790 | 59.675  |
| Path 4 | 58.693 | 60.267  |
| Path 5 | 59.484 | 60.667  |

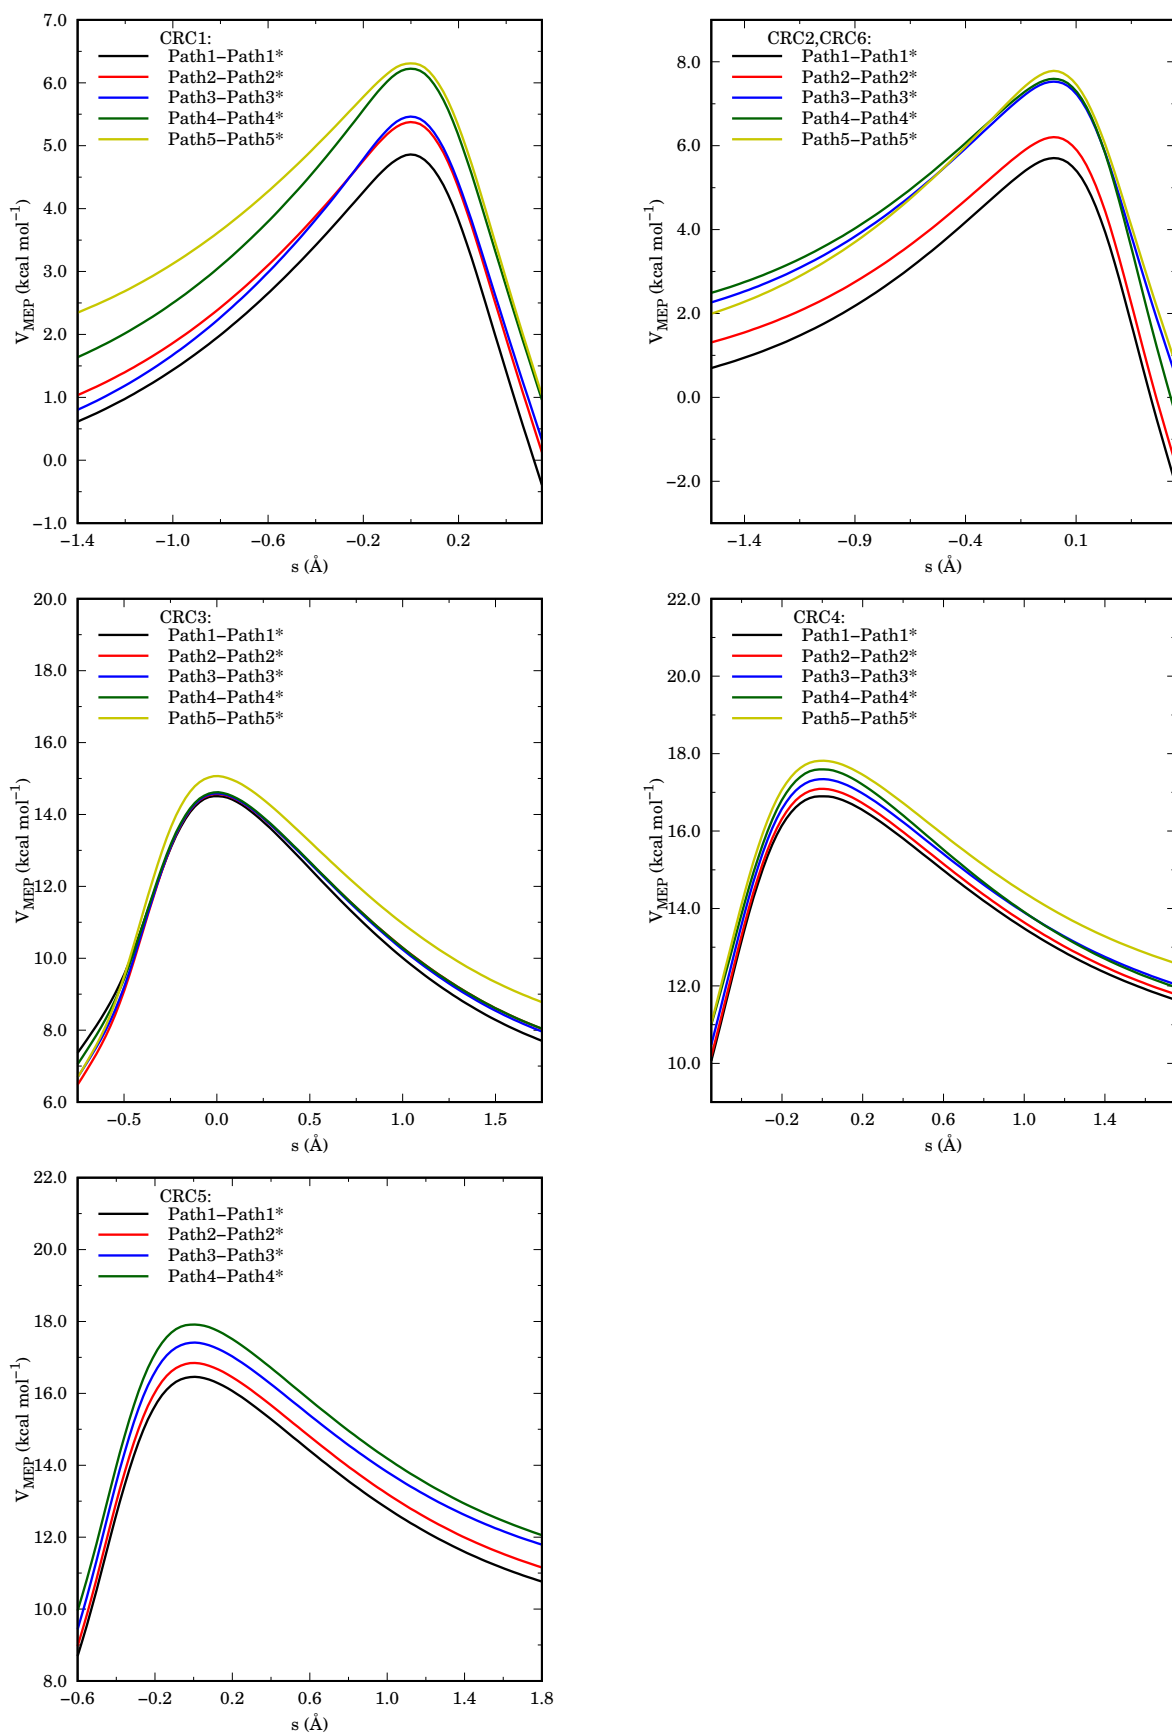

Figure S1: Minimum energy potentials ( $V_{MEP}$ ) for the individual paths of CRC1–CRC6.

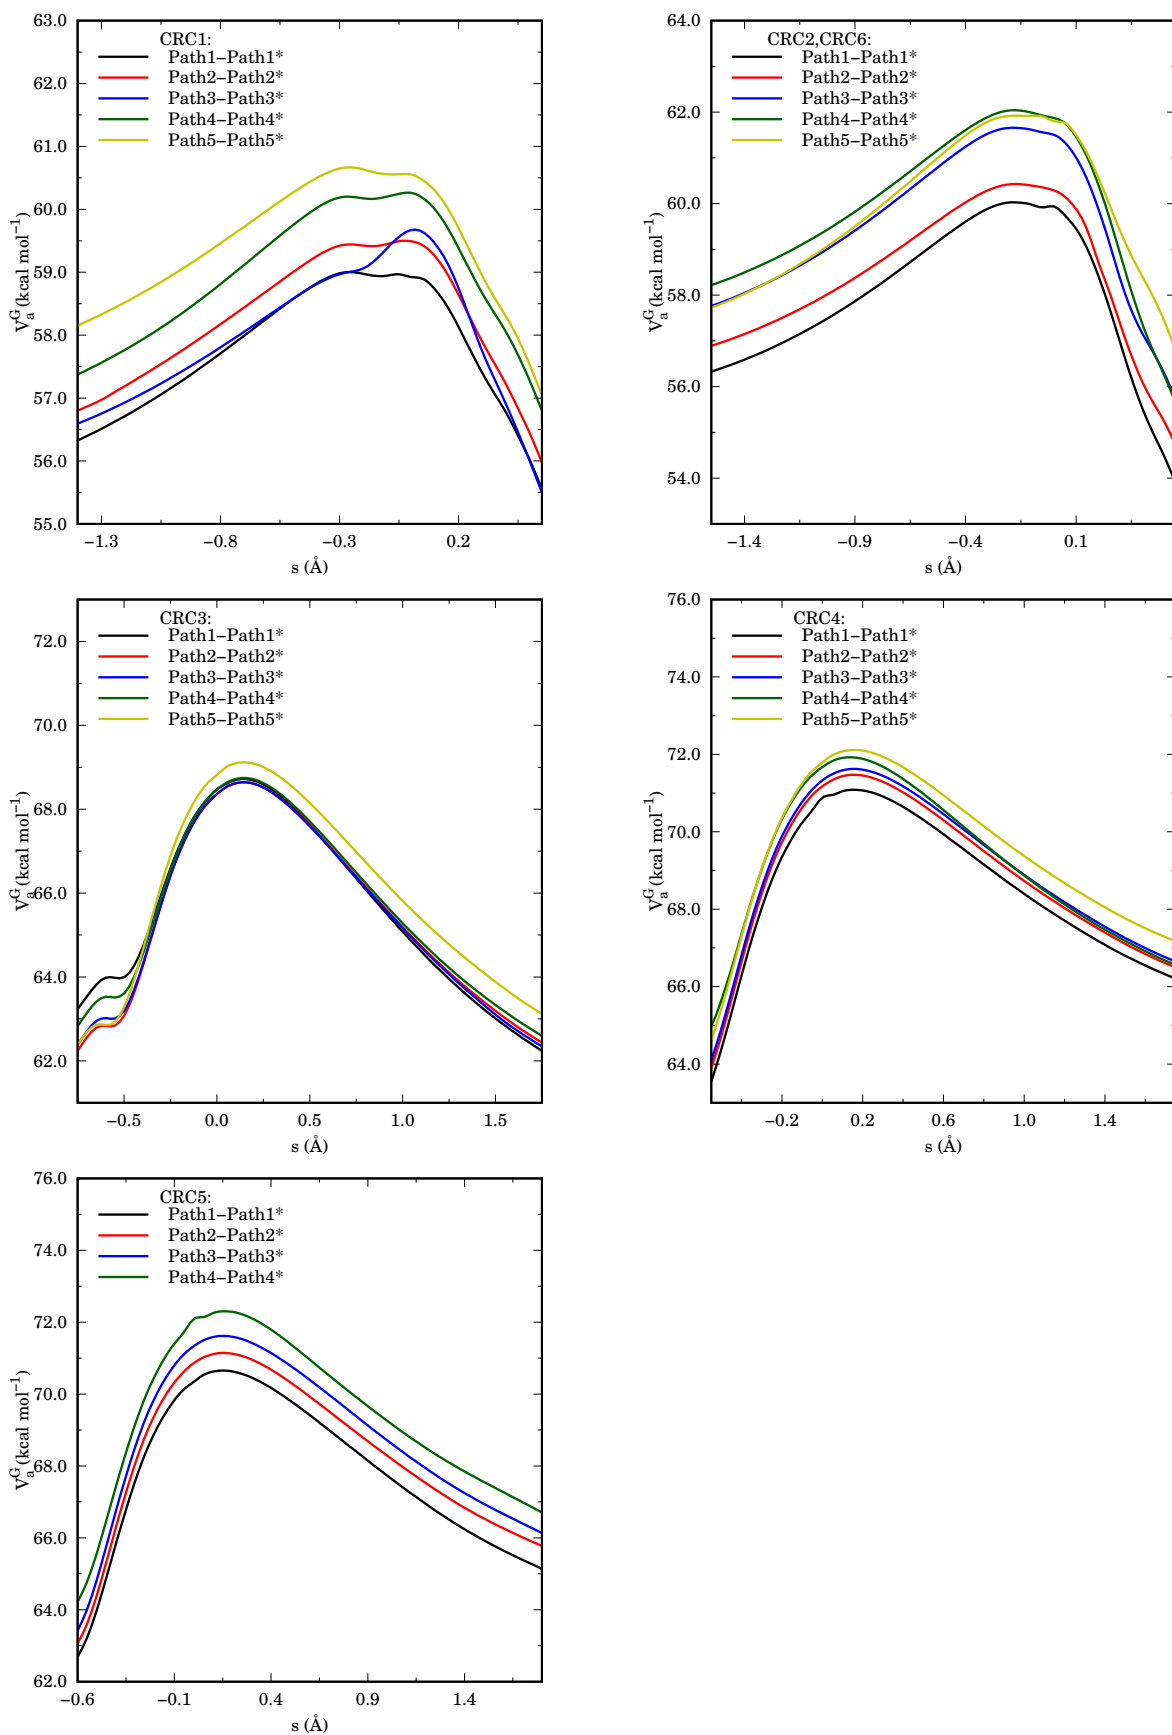

Figure S2: Vibrationally adiabatic potentials ( $V_a^G$ ) for the individual paths of CRC1–CRC6.

Table S62: Harmonic MS-TST thermal rate constants for (R1)–(R5) in a wide range of temperatures. All rate constants are in  $\text{cm}^3 \text{ molecule}^{-1} \text{ s}^{-1}$ .

| T(K)    | (R1)      | (R2)      | (R3)      | (R4)      | (R5)      |
|---------|-----------|-----------|-----------|-----------|-----------|
| 200.00  | 2.209E-15 | 4.699E-17 | 3.316E-25 | 2.741E-28 | 8.206E-28 |
| 300.00  | 4.683E-14 | 1.960E-15 | 1.642E-20 | 1.338E-22 | 2.441E-22 |
| 400.00  | 2.453E-13 | 1.469E-14 | 4.050E-18 | 1.054E-19 | 1.526E-19 |
| 500.00  | 7.199E-13 | 5.448E-14 | 1.189E-16 | 6.251E-18 | 7.944E-18 |
| 600.00  | 1.566E-12 | 1.402E-13 | 1.195E-15 | 1.008E-16 | 1.179E-16 |
| 700.00  | 2.854E-12 | 2.901E-13 | 6.481E-15 | 7.664E-16 | 8.468E-16 |
| 800.00  | 4.634E-12 | 5.204E-13 | 2.379E-14 | 3.628E-15 | 3.846E-15 |
| 900.00  | 6.942E-12 | 8.448E-13 | 6.715E-14 | 1.248E-14 | 1.282E-14 |
| 1000.00 | 9.804E-12 | 1.275E-12 | 1.573E-13 | 3.424E-14 | 3.433E-14 |
| 1100.00 | 1.324E-11 | 1.819E-12 | 3.210E-13 | 7.951E-14 | 7.821E-14 |
| 1200.00 | 1.725E-11 | 2.485E-12 | 5.900E-13 | 1.628E-13 | 1.576E-13 |
| 1300.00 | 2.184E-11 | 3.278E-12 | 9.994E-13 | 3.019E-13 | 2.885E-13 |
| 1400.00 | 2.702E-11 | 4.200E-12 | 1.586E-12 | 5.179E-13 | 4.894E-13 |
| 1500.00 | 3.277E-11 | 5.256E-12 | 2.388E-12 | 8.338E-13 | 7.805E-13 |
| 2000.00 | 6.995E-11 | 1.255E-11 | 1.086E-11 | 4.789E-12 | 4.343E-12 |
| 2500.00 | 1.203E-10 | 2.313E-11 | 2.938E-11 | 1.490E-11 | 1.327E-11 |

Table S63: MP-CVT/SCT thermal rate constants for (R1)–(R5), including the torsional anharmonicity estimated with MS-T(C) method All rate constants are in  $\text{cm}^3 \text{ molecule}^{-1} \text{ s}^{-1}$ .

| T(K)    | (R1)      | (R2)      | (R3)      | (R4)      | (R5)      |
|---------|-----------|-----------|-----------|-----------|-----------|
| 200.00  | 2.486E-14 | 8.173E-16 | 8.166E-24 | 2.327E-27 | 6.789E-27 |
| 300.00  | 1.433E-13 | 5.823E-15 | 5.121E-20 | 2.619E-22 | 4.765E-22 |
| 400.00  | 4.602E-13 | 2.329E-14 | 7.024E-18 | 1.455E-19 | 2.037E-19 |
| 500.00  | 1.061E-12 | 6.537E-14 | 1.592E-16 | 7.507E-18 | 8.996E-18 |
| 600.00  | 2.012E-12 | 1.490E-13 | 1.390E-15 | 1.126E-16 | 1.235E-16 |
| 700.00  | 3.363E-12 | 2.922E-13 | 6.632E-15 | 8.103E-16 | 8.501E-16 |
| 800.00  | 5.152E-12 | 5.136E-13 | 2.293E-14 | 3.612E-15 | 3.763E-15 |
| 900.00  | 7.407E-12 | 8.308E-13 | 5.957E-14 | 1.198E-14 | 1.182E-14 |
| 1000.00 | 1.015E-11 | 1.261E-12 | 1.355E-13 | 3.165E-14 | 2.936E-14 |
| 1100.00 | 1.328E-11 | 1.811E-12 | 2.638E-13 | 7.184E-14 | 6.643E-14 |
| 1200.00 | 1.696E-11 | 2.502E-12 | 4.770E-13 | 1.457E-13 | 1.334E-13 |
| 1300.00 | 2.110E-11 | 3.343E-12 | 7.979E-13 | 2.628E-13 | 2.438E-13 |
| 1400.00 | 2.571E-11 | 4.344E-12 | 1.254E-12 | 4.490E-13 | 3.930E-13 |
| 1500.00 | 3.080E-11 | 5.512E-12 | 1.873E-12 | 7.212E-13 | 6.279E-13 |
| 2000.00 | 6.296E-11 | 1.401E-11 | 8.202E-12 | 4.133E-12 | 3.539E-12 |
| 2500.00 | 1.056E-10 | 2.712E-11 | 2.204E-11 | 1.290E-11 | 1.096E-11 |

Table S64: Fitting parameters to the MP-CVT/SCT thermal rate constants for (R1)–(R5), including the torsional anharmonicity estimated with MS-T(C) method. The parameters for the the overall thermal rate constants were also listed.

|         | $A/\text{cm}^3 \text{ molecule}^{-1} \text{ s}^{-1}$ | $n$  | $E/\text{K}$ | $T_0/\text{K}$ | RMSR                  |
|---------|------------------------------------------------------|------|--------------|----------------|-----------------------|
| (R1)    | $1.62 \times 10^{-12}$                               | 2.10 | 620          | 171            | $6.72 \times 10^{-5}$ |
| (R2)    | $1.23 \times 10^{-13}$                               | 2.73 | 833          | 227            | $3.07 \times 10^{-4}$ |
| (R3)    | $4.62 \times 10^{-13}$                               | 2.62 | 3990         | 112            | $9.88 \times 10^{-5}$ |
| (R4)    | $3.94 \times 10^{-13}$                               | 2.69 | 5285         | 102            | $1.11 \times 10^{-4}$ |
| (R5)    | $2.69 \times 10^{-13}$                               | 2.75 | 5042         | 103            | $2.63 \times 10^{-4}$ |
| Overall | $6.93 \times 10^{-13}$                               | 2.69 | 379          | 127            | $3.34 \times 10^{-5}$ |

Table S65: Activation energies (in kcal/mol) for the overall thermal rate constants of (E)-2-Butenal and 3-Butenal with H-atom.

| T(K)   | (E)-2-Butenal + H | 3-Butenal + H |
|--------|-------------------|---------------|
| 200.0  | 1.86              | 1.86          |
| 300.0  | 2.81              | 2.54          |
| 400.0  | 3.53              | 3.12          |
| 500.0  | 4.13              | 3.66          |
| 600.0  | 4.69              | 4.20          |
| 800.0  | 5.76              | 4.74          |
| 1000.0 | 6.82              | 6.36          |
| 1500.0 | 9.47              | 9.09          |
| 2000.0 | 12.14             | 11.83         |
| 2500.0 | 14.82             | 14.58         |
